1           **Mucosal Associated Invariant T (MAIT) Cell Responses Differ by Sex in COVID-19**

2

3   Chen Yu<sup>1,†</sup>, Sejiro Littleton<sup>1,2,†</sup>, Nicholas Giroux<sup>3</sup>, Rose Mathew<sup>1</sup>, Shengli Ding<sup>3</sup>, Joan Kalnitsky<sup>1</sup>,  
4   Elizabeth W. Petzold<sup>5</sup>, Hong Chung<sup>3</sup>, Grecia Rivera Palomino<sup>3</sup>, Tomer Rotstein<sup>3</sup>, Rui Xi<sup>3</sup>, Emily R.  
5   Ko<sup>5,6</sup>, Ephraim L. Tsalik<sup>5,7,8</sup>, Gregory D. Sempowski<sup>9</sup>, Thomas N. Denny<sup>9</sup>, Thomas W. Burke<sup>5</sup>, Micah T.  
6   McClain<sup>5,7-8</sup>, Christopher W. Woods<sup>5,7-9</sup>, Xiling Shen<sup>3</sup>, Daniel R. Saban<sup>1,2,\*</sup>

7   **Affiliations:**

8   <sup>1</sup>*Department of Ophthalmology, Duke University School of Medicine, Durham, NC, USA.*

9   <sup>2</sup>*Department of Immunology, Duke University School of Medicine, Durham, NC, USA.*

10   <sup>3</sup>*Department of Biomedical Engineering, Pratt School of Engineering, Duke University, Durham, NC,*  
11   *USA.*

12   <sup>4</sup>*Department of Cell Biology, Duke University Medical School, Durham, United States.*

13   <sup>5</sup>*Center for Applied Genomics and Precision Medicine, Duke University, Durham, NC, USA*

14   <sup>6</sup>*Duke Department of Medicine, Duke University School of Medicine, Durham, NC, USA*

15   <sup>7</sup>*Durham Veterans Affairs Health Care System, Durham, NC, USA*

16   <sup>8</sup>*Division of Infectious Diseases, Duke University Medical Center, Durham, NC, USA*

17   <sup>9</sup>*Duke Human Vaccine Institute, Duke University Medical Center, Durham, NC, USA*

18   <sup>†</sup>These authors contributed equally to this work.

19   <sup>\*</sup>Corresponding author. E-mail: [daniel.saban@duke.edu](mailto:daniel.saban@duke.edu)

20 **ABSTRACT**

21 Sexual dimorphisms in immune responses contribute to coronavirus disease 2019 (COVID-19)  
22 outcomes, yet the mechanisms governing this disparity remain incompletely understood. We carried out  
23 sex-balanced sampling of peripheral blood mononuclear cells from confirmed COVID-19 inpatients and  
24 outpatients, uninfected close contacts, and healthy controls for 36-color flow cytometry and single cell  
25 RNA-sequencing. Our results revealed a pronounced reduction of circulating mucosal associated  
26 invariant T (MAIT) cells in infected females. Integration of published COVID-19 airway tissue datasets  
27 implicate that this reduction represented a major wave of MAIT cell extravasation during early infection  
28 in females. Moreover, female MAIT cells possessed an immunologically active gene signature, whereas  
29 male counterparts were pro-apoptotic. Collectively, our findings uncover a female-specific protective  
30 MAIT profile, potentially shedding light on reduced COVID-19 susceptibility in females.

31 **MAIN TEXT**

32 Severe Acute Respiratory Syndrome Coronavirus 2 (SARS-CoV-2) has led to a global pandemic of  
33 Coronavirus Disease 2019 (COVID-19) and a death toll of more than over 1.4 million people and rising  
34 (1). Among reported sex disaggregated data, males are disproportionately affected by SARS-CoV-2,  
35 with a higher incidence of cases, mortality, and morbidity (2). This follows a similar trend toward higher  
36 case fatality rates for males in Severe Acute Respiratory Syndrome Coronavirus (SARS-CoV) and  
37 Middle East Respiratory Syndrome Coronavirus (MERS-CoV), as well as with experiments using  
38 SARS-CoV mouse models (2-6). Sex differences in the immune response are thought to be a key  
39 contributing factor to these coronavirus disease outcomes, agreeing with the current body of knowledge  
40 that innate and adaptive immune responses are substantially altered across sex (7-10). Specific to  
41 SARS-CoV-2 infection, responses of both lymphocytes and myeloid cells were shown to be associated  
42 with COVID-19 outcomes (11-19). Correspondingly, a recent study on sex differences in COVID-19  
43 immune responses uncovered an association between poor disease outcomes in males and weak T  
44 cell responses in both CD4<sup>+</sup> and CD8<sup>+</sup> compartments, whereas poor outcomes in females were  
45 associated with high innate immune cytokines, tumor necrosis factor superfamily (TNFSF)-10 and  
46 interleukin (IL)-15 (20). The sex differences elucidated in this seminal study further cement the need to  
47 better understand the mechanisms governing sex-specific susceptibility to SARS-CoV-2.

48 In the current study, we carried out sex-balanced sampling of peripheral blood mononuclear cells  
49 (PBMCs) from COVID-19 patients and control subjects for 36-color flow cytometry and single cell RNA-  
50 sequencing (scRNA-seq) analyses. A total of 88 samples were analyzed from 45 individuals. Details on  
51 subject demographics and sample information are summarized in **(Fig. 1A, table 1 and S1)**. Briefly, we  
52 analyzed samples from 28 patients with COVID-19 as confirmed by a positive SARS-CoV-2 PCR  
53 and/or IgG seroconversion. These included 9 inpatient subjects (20%), 7 requiring intensive care,  
54 henceforth referred to as “hospitalized.” An additional 19 subjects were identified in outpatient settings  
55 (42.2%), henceforth referred to as “infected”. Most of these COVID-19 confirmed cases were sampled

56 longitudinally (a range 1-28 days) including pre- and post- anti-SARS-CoV-2 immunoglobulin (IgG)  
57 seroconversion. The dates of symptom onset for all confirmed COVID-19 subjects were recorded at  
58 enrollment, providing an illness range of 1-40 days. We also recorded symptom severity, obtained via  
59 investigator survey on 39 symptoms related to COVID-19 (see Methods). Additionally, we included 7  
60 subjects (15.6%) henceforth referred to as “exposed,” who were also sampled at multiple timepoints.  
61 These subjects, despite being close contacts of infected individuals, remained with negligible symptom  
62 scores, were negative for SARS-CoV-2 by PCR, and did not demonstrate detectable anti-SARS-CoV-2  
63 IgG for at least 2 months after enrollment. Lastly, we included a group of 10 “healthy” subjects (22.2%)  
64 who were enrolled prior to the pandemic in 2019 and did not show any symptoms associated with  
65 COVID-19 or other respiratory illness (21).

#### 66 ***Immune Profiling of COVID-19 Patient PBMCs Reveals Sex Differences in CD8<sup>+</sup> Lymphocytes***

67 With these flow cytometry data (**Table S2**), we generated a map of immune cell populations and their  
68 subsets by down-sampling to 3,000 viable CD45<sup>+</sup> singlets per sample and concatenated all data for  
69 Uniform Manifold Approximation and Projection (UMAP) (22) and unbiased clustering via Flow Self-  
70 Organizing Maps (FlowSOM) (23). Unique marker expressions of respective populations facilitated our  
71 annotation of major PBMC populations, including CD4<sup>+</sup> and CD8<sup>+</sup> ( $\alpha\beta$ ) T cells,  $\gamma\delta$  T cells, B cells,  
72 plasmablasts, natural killer (NK) cells, monocytes (MO), and dendritic cells (DC), and confirmed by  
73 manual analysis (**Fig. 1B**, and **fig. S1, A to E**). Sub-populations were also annotated in this manner,  
74 such as CD45RA<sup>+</sup> CD27<sup>+</sup> CCR7<sup>+</sup> naive, CD45RA<sup>-</sup> CCR7<sup>+</sup> central memory (CM), CD45RA<sup>-</sup> CCR7<sup>-</sup>  
75 effector memory (EM) and CD45RA<sup>+</sup> CD27<sup>-</sup> CCR7<sup>-</sup> terminally differentiated effector memory (EMRA)  
76 CD8<sup>+</sup> T cells, as well as CD8<sup>+</sup> CD161<sup>hi</sup> T cells and other indicated sub-populations (**Fig. 1B**, and **fig.**  
77 **S1, A to E**). We noted that a minor population of basophils (Baso) and neutrophils (PMN) primarily from  
78 hospitalized patients were detected (**Fig. 1B**), despite using a PBMC isolation protocol.

79 We next set out to examine our flow cytometry dataset for immune populations that exhibited major  
80 quantitative changes in COVID-19. Our first strategy was to stratify the data by disease severity (i.e.,  
81 healthy, exposed, infected, and hospitalized). We noted that samples from hospitalized patients had  
82 substantially fewer PBMCs suggestive of lymphopenia (24). Manual gating of all flow cytometry events  
83 was performed for this analysis. Our results showed differences in B cells (naïve, IgD<sup>+</sup> non-class  
84 switch, and plasmablasts); natural killer (NK) cells (CD56<sup>lo</sup> populations); DCs (CD141<sup>+</sup>, CD1c<sup>+</sup>, and  
85 pDCs); monocytes (classical, intermediate and nonclassical); CD4<sup>+</sup> (EM) and CD8<sup>+</sup> (EM) αβ T cells  
86 **(Fig. S2)**. Interestingly, our data also revealed a high statistical significance ( $p=0.0006$ ) in CD8<sup>+</sup>  
87 CD161<sup>hi</sup> T cells **(Fig. S2)** prompting us to look closer at these cells. Regarding annotation of this  
88 CD161<sup>hi</sup> cluster, because the overwhelming majority of events are low to negative for CD56 and for T-  
89 cell receptor (TCR)-γδ **(Fig. 1C)**, the phenotype is largely consistent with mucosal associated invariant  
90 T (MAIT) cells, but not NKT or γδ T cells. This designation is congruent with recent work in COVID-19  
91 PBMCs (25-27). We therefore conclude that the frequencies of certain myeloid and lymphocyte  
92 populations are affected in COVID-19, including a major effect on CD8<sup>+</sup> CD161<sup>hi</sup> T cells.

93 Knowing that the overwhelming majority of the CD8<sup>+</sup> CD161<sup>hi</sup> population (henceforth referred to as  
94 CD161<sup>hi</sup>) in our and others' datasets (25-27) is likely comprised of MAIT cells, we performed a more  
95 focused analysis of this cluster in COVID-19 **(Fig. S3A)**. First, we analyzed their frequencies by disease  
96 severity using the samples taken within 3 days of enrollment, the timepoint most proximal to the initial  
97 symptom score recordings. Results were displayed via UMAP contour plots, revealing a reduction in  
98 these cells in the SARS-CoV-2 settings **(Fig. 1D)**. Manual gating from all flow cytometry events  
99 revealed a significant reduction when comparing healthy ( $p=0.0036$ ) or exposed ( $p=0.0488$ ) subjects  
100 versus hospitalized subjects, as well as a negative correlation ( $p=0.0002$ ) with disease severity **(Fig. 1E**  
101 **and Fig. S3B)**. We also characterized the frequencies of CD161<sup>hi</sup> cells stratified by time post symptom  
102 onset, including early ( $\leq 14$  days), middle (15 to 21 days), and late ( $>21$  days) timepoints. In addition,  
103 we separated the data by sex given the known sex differences in immune responses in COVID-19 (2,

104 20). Results showed that within the CD8<sup>+</sup> compartment of healthy subjects, females had greater  
105 frequencies of CD161<sup>hi</sup> cells relative to males, whereas males had greater frequencies of CD8<sup>+</sup> memory  
106 T cells (combined EMRA, EM and CM) (**Fig. 1F**, and **G**). No obvious changes of naïve CD8<sup>+</sup> T were  
107 found (**Fig. S3C**). While the memory cell predominance in males was preserved at all timepoints, the  
108 greater abundance of CD161<sup>hi</sup> cells in females was lost at early and middle timepoints (albeit not in late  
109 disease). The loss of this difference was due to a precipitous drop of CD161<sup>hi</sup> cells in females at early  
110 and middle timepoints (**Fig. 1H**). Lastly, we stratified data from confirmed COVID-19 patients by  
111 seroconversion status. This showed CD161<sup>hi</sup> cells were higher in females relative to males prior to  
112 seroconversion, whereas CD8<sup>+</sup> memory cells were higher in males in seroconverted subjects (**Fig. 1I**).  
113 Taken together, we identified a female-specific decline in circulating CD161<sup>hi</sup> cell frequencies upon  
114 exposure/infection of SARS-CoV-2. This sex-specific reduction may be due to extravasation into airway  
115 tissues, thereby suggesting a key sex-specific role for these CD161<sup>hi</sup> cells in COVID-19.

#### 116 ***scRNA-seq of PBMCs Implicates Involvement of CD161<sup>hi</sup> Lymphocyte Responses in COVID-19***

117 Given the potentially important role for CD161<sup>hi</sup> cells in COVID-19, we sought to further characterize  
118 this population by scRNA-seq (10x Genomics). We analyzed 48 different PBMC samples from 24  
119 subjects across all groups (**Table 1** and **table S1**). Data were processed using Seurat 3 package (28)  
120 and subsequent transcript-based annotation was carried out (**Fig. 2A**, **fig. S4, A** and **B**). Focusing on  
121 the T cells in the data (**Fig. 2B** and **table S3**), we were able to identify CD161<sup>hi</sup> cells in a single cluster  
122 containing high *KLRB1* (i.e., CD161) expression, and co-expression of *CD3D* and *CD8A*, as well as  
123 *TRAV1-2* (**Fig. 2C** and **fig. S4B**), which encodes the Vα7.2 invariant TCR alpha chain on MAIT cells.  
124 Grouping these data by disease severity showed that hospitalized patients had lower frequencies of T  
125 cells, including CD161<sup>hi</sup> cells (**Fig. 2D**), agreeing with our flow cytometry findings and consistent with  
126 reported lymphopenia in severe COVID-19 patients (11, 20, 29-32). Also showing the same trend as  
127 our flow cytometry data was the high frequency of CD161<sup>hi</sup> cells in healthy females (**Fig. 2E**), although  
128 it did not reach statistical significance due to the variations between healthy females and males. Next,

129 to address the functional role of this CD161<sup>hi</sup> cluster in COVID-19, we performed gene enrichment  
130 analysis using differentially expressed genes (DEGs). With several top ranked hits consisting of  
131 immune pathways and an estrogen-dependent pathway (**Fig. 2F**), our results inferred a sex-specific  
132 immune response of these CD161<sup>hi</sup> cells in COVID-19. To further characterize functional inferences, we  
133 applied the CellphoneDB package (33) and analyzed ligand-receptor interactions with monocyte  
134 clusters within our data (**Fig. S5, A and B**), given the critical link that was previously published between  
135 monocyte activation in COVID-19 outcomes (12, 13, 20, 34). Our results inferred unique interactions  
136 between CD161<sup>hi</sup> cells and monocytes with the following gene-pairs: *KLRB1\_CLEC2D*, *CCL5\_CCR1*,  
137 *CXCR6\_CXCL16*, and *IL18\_IL-18R* (**Fig. S5, C and D**). Moreover, the number of interaction-counts of  
138 monocytes was the most abundant with the CD161<sup>hi</sup> cluster relative to all major T cell populations (**Fig.**  
139 **S5E**). Taken together, these transcriptome findings further support a significant role for circulating  
140 CD161<sup>hi</sup> cells in the SARS-CoV-2 immune response.

#### 141 ***Sex-Specific Differences of Circulating MAIT cells in COVID-19***

142 To analyze our scRNA-seq dataset for potential sex differences in circulating CD161<sup>hi</sup> cells, we first  
143 sought to examine for phenotypic heterogeneity within this population. To do this, we performed a  
144 focused sub-cluster analysis, which generated 3 distinct clusters (**Fig. 3A**). However, the added  
145 resolution revealed a cluster that expressed *TRDC*, encoding the constant region of the  $\delta$  chain  
146 expressed by  $\gamma\delta$  T cells (**Fig. 3B**) and thereby excluded from subsequent analyses. By contrast, the  
147 other two clusters had higher *KLRB1* expression, as well as *TRAV1-2* (**Fig. 3B**), therefore referred to  
148 here as MAIT $\alpha$  and MAIT $\beta$  clusters. Of note, these 2 clusters make up approximately 80% of CD161<sup>hi</sup>  
149 PBMCs, which is consistent with the previous report of circulating MAIT cell frequencies (25). Our  
150 results showed that the MAIT $\alpha$  cluster possessed upregulated genes associated with cytotoxic T cells  
151 (*GNLY*, *CD8A*, *CD8B*), migration/adhesion (*CXCR4*, *ITGB2*), and cytokine signaling (*IRF1*, *B2M*,  
152 *NFKBIA*, *JUNB*, *FOS*) (**Fig. 3C** and **table S4**). The MAIT $\beta$  cluster was enriched for genes of ribosomal  
153 proteins, apoptosis (*BAX*, *STUB1*) and the linker histone H1 associated with apoptosis (*HIST1H1C*,

154 *HIST1H1D*, *HIST1H1E*) (**Fig. 3C** and **table S4**). Gene enrichment analysis further supported a  
155 functional dichotomy for  $\alpha$  and  $\beta$  clusters. Whereas MAIT $\alpha$  was enriched with several immune process  
156 pathways (e.g., IFN- $\gamma$ , and IL-4 and IL-13 signaling, as well as antigen processing and presenting),  
157 MAIT $\beta$  was enriched in cellular responses to external stimuli, metabolism of RNA, viral infection, and  
158 programmed cell death, but not immune processes (**Fig. 3, D and E**, and **table S5**). Hence our results  
159 suggest MAIT cell heterogeneity, with the MAIT $\alpha$  signature representing an immunologically  
160 poised/active phenotype, while the MAIT $\beta$  signature represents a stressed/apoptotic phenotype.

161 Last for this series of experiments, we sought to determine the dynamics of the two phenotypically  
162 distinct clusters by sex over the COVID-19 disease course. By first grouping our data by severity, we  
163 found that MAIT $\alpha$  was the major phenotype in healthy individuals, while MAIT $\beta$  predominated in  
164 exposed and infected groups (**Fig. 3, F and G**). There was a noted exception for hospitalized patients  
165 (**Fig. 3F**), bearing very few cells as seen in our flow cytometry data, consistent with lymphopenia that  
166 occurs in severe COVID-19 (24). We then grouped our data by time post symptom onset, as we  
167 detailed earlier with our flow cytometry data. Results showed that relative to healthy subjects, MAIT $\alpha$   
168 percentages were lower in early, middle, and late timepoints, whereas MAIT $\beta$  demonstrated the  
169 converse (**Fig. 3H**). When stratified by sex, we found that MAIT cell frequencies were higher in healthy  
170 females (**Fig. 3, I and J**), corroborating our flow cytometry results. These cells in healthy females were  
171 skewed toward the MAIT $\alpha$  cluster, whereas the few cells present in healthy males consisted mostly of  
172 MAIT $\beta$  (**Fig. 3I**). However, this difference was lost in exposed/infected setting, where both sexes were  
173 comprised mostly of MAIT $\beta$  (**Fig. 3J**). Nonetheless, MAIT $\beta$  percentages were statistically greater in  
174 females in late disease (**Fig. 3J**), which reflects the increased MAIT cells during late infection in  
175 females as shown in our flow cytometry findings. Regarding expression of *CD69*, a T cell activation  
176 marker, we did not observe major differences across cluster or sex, but did observe elevated  
177 expression in the hospitalized group (**Fig. S6, A to D**). This possibly suggests an altered MAIT cell



178 response in hospitalized patients (25-27, 35). In short, these results reveal sex specific MAIT cell  
179 differences at the quantitative and phenotypic levels in health and COVID-19.

### 180 ***Respiratory Tract MAIT Cell Responses Differ by Sex in COVID-19***

181 To assess potential sex-specific differences in MAIT cells at the tissue level in COVID-19 patient  
182 airways, we utilized published scRNAseq datasets of bronchoalveolar lavage fluid (BALF) (36) and of  
183 nasopharyngeal swab (NPS) (37). Beginning our analysis with the BALF dataset, we identified the  
184 MAIT cell cluster by expression of *TRAV1-2*, *CD3D*, *KLRB1* and *SLC4A10* (**Fig. 4, A to C**). With this  
185 annotation, we found a significant increase ( $p=0.0188$ ) of MAIT cells in COVID-19 patients relative to  
186 normal controls and a higher MAIT cell frequency ( $p=0.0332$ ) in females relative to males among  
187 COVID-19 subjects (**Fig. 4D**). This detection of increased MAIT cells in female BALF, along with the  
188 drop in these cells we observed in female peripheral blood, suggest a female dominant extravasation of  
189 MAITs in COVID-19.

190 To perform the same analysis with NPS samples, we integrated the T cell data from NPS with those  
191 from BALF to identify MAIT cells in NPS (**Fig. 4, E and F**), since TCR genes were not aligned in the  
192 NPS dataset (37). With this annotation, we quantified MAIT cell frequencies in the NPS dataset, again  
193 observing a significant increase ( $p=0.0139$ ) in COVID-19 patients (**Fig. 4G**). We also analyzed the data  
194 across severity, observing a significant increase ( $p=0.0038$ ) in moderate subjects relative to the normal  
195 and a decrease ( $p=0.0366$ ) relative to critical COVID-19 subjects (**Fig. 4 H, I**). We could not perform the  
196 same analysis by sex due to insufficient number of female samples (**Fig. 4 I**). Nonetheless, these  
197 results match the reduced circulating MAIT cell frequencies seen in our hospitalized subjects, together  
198 suggesting that a lymphopenic state which occurs in severe COVID-19 impacts MAIT cells, consistent  
199 with other reports (25-27, 38).

200 In a final experiment, we sought to characterize MAIT cell transcriptomes by sex in the BALF and NPS  
201 datasets and determine whether these cells resembled  $\alpha$  and  $\beta$  phenotypes we identified in circulating

202 MAIT cells. Cluster analysis was not warranted here given low cell numbers in these datasets. Instead,  
203 we leveraged gene modules derived from our respective  $\alpha$  and  $\beta$  clusters of circulating MAIT cells.  
204 We found that MAIT cells in BALF and NPS data were largely skewed toward the  $\beta$  module, with  
205 minimal sex differences (**Fig. S7A**). However, when we directly examined differentially expressed  
206 genes (the DEGs between sex, we were able to detect sex differences associated with  $\alpha$  and  $\beta$   
207 phenotypes. Specifically, in BALF, we found increased *IL7R* expression in females (**Fig. 4J**) and other  
208 IL-7 signaling associated genes (*CISH* and *SOCS1*) (**Fig. 4K**). Given the critical role of this signaling in  
209 T cell survival, we explored additional pathway genes, finding that female MAIT cells had upregulated  
210 anti-apoptotic genes (*BCL2* and *FOXP1*) and downregulated pro-apoptotic genes (*BAX* and *CASP3*)  
211 (**Fig. S7, B and C**). Also observed in female cells was upregulated anti-proliferative genes (*CDKN1B*  
212 and *BTG2*) (**Fig. S7D**). These patterns matched MAIT $\alpha$  gene changes in our PBMC dataset. We were  
213 able to find other sex differences, including increased expression of several transcription factors (*KLF2*,  
214 *MYC*, and *CEBPD*) (**Fig. 4L**). Conversely, male cells had higher expression of *CCL2* (**Fig. 4 M**), which  
215 has been linked to COVID-19 immunopathology (39). In short, our results infer sex differences at the  
216 qualitative level in COVID-19, with female MAIT cells possessing a pro-survival and immunologically  
217 active phenotype.

## 218 **DISCUSSION**

219 Despite the knowledge of sex differences in the immune response as an underlying factor in COVID-19  
220 disease outcomes, the sexual dimorphic responses of MAIT cells, an unconventional T cell population  
221 deemed important in this disease, remained unknown. We now demonstrate that MAIT cells in females  
222 are quantitatively and qualitatively more robust in the SARS-CoV-2 setting, potentially helping  
223 understand the immunological reasons for reduced COVID-19 susceptibility in females.

224 Our finding that MAIT recruitment to airway tissues may be more robust in COVID-19 females was  
225 aided first by our observation of higher circulating MAIT cell frequencies in females in the healthy

226 setting. This difference can be explained by the rate of physiological aging-related attrition of MAIT cells  
227 that is substantially less pronounced in female blood (40-42). The resultant higher frequencies in  
228 circulation enabled us to readily uncover the precipitous percentage drop we saw with MAIT cells  
229 relative to exposed/infected females. In trying to elucidate the potential cause of this drop, we  
230 considered two possible scenarios: 1) lymphopenia and 2) extravasation, which are not necessarily  
231 mutually exclusive. For the former, it is accepted that lymphopenia is associated with severe COVID-19  
232 infections (24, 32, 43, 44), which which agrees with our observations in our hospitalized group  
233 (comprised of 77.8% intensive care patients). Similarly, lymphopenia could partially explain the  
234 reduction in MAIT cells described by Jouan *et al* in a study of male-dominated samples from critically ill  
235 COVID-19 patients (27), though extravasation also likely occurred. In our study, however, we  
236 demonstrated that circulating MAIT frequencies drop in our infected outpatient group. As these subjects  
237 were not critically ill, our findings point to extravasation as a major reason for the sex-specific drop in  
238 circulating MAIT frequencies. The same pattern may also exist in several other studies (25, 26, 35). For  
239 example, while Parrot *et al* (25) also demonstrated that circulating MAIT cells are reduced in moderate  
240 COVID-19 patients relative to healthy subjects in aggregated data, it is possible that the healthy female  
241 frequencies contributed to reaching the statistical difference. Further supporting our conclusion, we  
242 were able to show with publicly available scRNA-seq data from COVID-19 BALF samples (36) that  
243 females in that study had an increased MAIT cell percentage relative to males, allowing us to conclude  
244 that MAIT cell extravasation during COVID-19 may be quantitatively more robust in females.

245 Our results also suggest that MAIT cells may be qualitatively superior in females, with respect to anti-  
246 viral immune activity in COVID-19. Leading us to this conclusion, our scRNA-seq analysis of patient  
247 PBMCs revealed two distinct clusters of MAIT cells, referred to here as MAIT $\alpha$  and MAIT $\beta$ . The  $\alpha$   
248 cluster was enriched for various immune pathways, such as IFN- $\gamma$  signaling, inferring a capacity for  
249 anti-viral immune function. In contrast, the  $\beta$  cluster was enriched for cell stress and apoptosis  
250 pathways, inferring a frail phenotype roughly similar to a previously described population of double

251 negative MAIT cells (45, 46). We showed in the healthy setting that MAIT cells in females were skewed  
252 toward the  $\alpha$  cluster, whereas males comprised the  $\beta$  cluster. Though from these results it could be  
253 presumed that the  $\alpha$  cluster should be overrepresented in COVID-19 airways of females, this was not  
254 the case in the BALF. However, we reasoned that such a finding would be very difficult to make for two  
255 main reasons. First, extravasated MAIT cells with an  $\alpha$ -phenotype would be restricted to the early wave  
256 of recruitment, since circulating cells are almost completely skewed to the  $\beta$  module in exposed/infected  
257 individuals. Second, a certain level of transcriptional reprogramming would occur upon immune cell  
258 extravasation into the tissue and potentially again upon accessing the alveolar space. Still, we were  
259 able to show in BALF that certain gene patterns remained consistent with the  $\alpha$  signature in females  
260 versus males. In addition, our finding that female BALF samples had quantitatively more MAIT cells  
261 gives further credence that differences revealed in blood would likewise extend to the tissue.

262 In summary, we conclude that MAIT cells in females are quantitatively and qualitatively distinct from  
263 males and we surmise that this distinction provides a protective advantage in the SARS-CoV-2 setting.  
264 Indeed, females in general tend to have elevated frequencies of circulating MAIT cells, also gleaned by  
265 large independent studies with European (40), South Korean (41) and Chinese populations (42).  
266 Further supporting this argument, it has now been recorded that adult COVID-19 fatality rates trend  
267 less in females at all ages across 39 different countries, including in North America, Europe, and Asia  
268 where MAIT cell frequencies trend higher in females (2). These points also argue against the possibility  
269 that an immunologically more robust MAIT cell response has a net negative effect, for example, by  
270 immunological misfiring (20) or cytokine storm related immunopathology (39). However, one open  
271 question that our findings now raise is whether males in our study, which had greater circulating CD8+  
272 memory T cells, would instead have an advantage in the reinfection setting or following vaccination.  
273 Future studies are needed to explore this question, and to better understand sex differences in MAIT  
274 cells both in general and in COVID-19.

## 275 **MATERIALS AND METHODS**

### 276 *Ethics statement*

277 This study and relevant protocols were approved by the Institutional Review Boards of Duke University  
278 Health System (DUHS) ?. All procedures were performed in accordance with the Declaration of  
279 Helsinki, applicable regulations, and local policies.

### 280 *Participants in this study*

281 In-patients (hospitalized) and out-patients (infected) with confirmed infection of SARS-CoV-2 were  
282 identified through the DUHS and enrolled into the Molecular and Epidemiological Study of Suspected  
283 Infection (MESSI, Pro00100241). The RT-PCR testing for SARS-CoV-2 was performed at either the  
284 North Carolina State Laboratory of Public Health or at clinical laboratories of the DUHS. The exposed  
285 group, who closely contacted with COVID-19 patients, presented negative PCR test and negative  
286 serology test during longitudinally sampling from the first visit to at least 2 months after, typically 0, 7,  
287 14, and 28 days relative to enrollment. Initial severity scores of individuals were recorded through a  
288 self-reporting survey on 38 defined symptoms related to COVID-19 plus “other” when enrolled. The  
289 exposed group (average score = 9.71) showed a lower severity scores compared with infected (out-  
290 patients) group (average score = 18.16). The hospitalized patients presented severe disease symptoms  
291 with breath difficulty, cough, fever or chest pain when enrolled, and 77.8% of them for this study  
292 required intensive care unit (ICU) care. All COVID-19 patients were also longitudinally sampled with  
293 serology test from enrollment to convalescent phase. Healthy donors were enrolled in 2019 (Duke IRB  
294 Protocol Pro00009459) with no diagnosis or symptoms consistent with COVID-19 or other respiratory  
295 illness. Written informed consent was obtained from all subjects or legally authorized representatives.  
296 Patient Demographics are summarized in Table 1.

### 297 *Collection of peripheral blood mononuclear cells (PBMCs)*

298 PBMC cells were prepared using Ficoll-Hypaque density gradient method. Briefly, peripheral whole  
299 blood was collected in EDTA vacutainer tubes and processed within 8 hours. Blood was diluted 1:2 in  
300 PBS then layered onto the Ficoll-Hypaque in 50 ml conical tube and centrifuged at 420g for 25 min.  
301 Buffy coat was collected and washed with D-PBS by centrifugation at 400g for 10min. Cell pellets were  
302 resuspended in D-PBS and washed again. PBMCs were assessed for viability and cell count using Vi-  
303 Cell automated cell counter (Beckman-Coulter). PBMCs were adjusted to  $10 \times 10^6$  cells/ml in  
304 cryopreservation media (90% FBS, 10% DMSO) and aliquoted into cryopreservation vials on ice. Cells  
305 underwent controlled freezing at  $-80^\circ\text{C}$  using CoolCell LX (BioCision) for 12-24 hours, then transferred  
306 to liquid nitrogen vapor phase.

#### 307 *Sample processing for flow cytometry and single cell RNA-sequencing (scRNA-seq)*

308 Counts and cell viability of thawed PBMCs were measured by Countess II after a wash with DMEM  
309 10% FBS. The cell viability of hospitalized patients ranged from 70-80% whereas all other samples  
310 exceeded 80% viability. An additional dead cell removal step (Miltenyi Biotec) was conducted on  
311 hospitalized PBMC samples prior to aliquot for scRNA-seq. To perform scRNA-seq, 200,000 cells per  
312 sample were aliquoted, spun down, resuspended in 30  $\mu\text{l}$  PBS supplemented with 0.04% BSA and  
313 0.2U/  $\mu\text{l}$  RNase inhibitor and counted using Countess II.

#### 314 *Panel and Staining for Flow Cytometry*

315 Approximately  $0.5-2 \times 10^6$  cells per cryopreserved sample were stained for flow cytometry analysis.  
316 Antibody titrations used in this study were previously established by Cytex Biosciences with slight  
317 modifications (see Table S2 for flow panel information). All staining procedures were performed at room  
318 temperature. PBMCs were stained with live/dead Blue (Thermofisher) for 15 min, washed with FACS-  
319 EDTA buffer and spun down at 1500 rpm for 5min. Samples were resuspended with Brilliant Stain  
320 Buffer Plus (BD Biosciences) and sequentially stained with anti-CCR7 for 10 min, the chemokine  
321 receptor mix for 5 min, anti-TCR gamma/delta for 10 min and the surface receptor mix for 30 min. After

322 incubation, PBMCs were washed with FACS-EDTA buffer and spun down at 1500 rpm for 5min.

323 Samples were fixed with 1% PFA in PBS for 20 min, spun down and resuspended in FACS-EDTA

324 buffer.

### 325 *36-color Full Spectrum Flow Cytometry*

326 Samples were acquired using a four-laser Cytex Aurora Spectral Flow Cytometry System. Single color

327 controls for spectral unmixing were done with PBMCs from healthy control blood and UltraComp

328 eBeads (ThermoFisher). Raw data were unmixed and further analyzed using either FlowJo for manual

329 gating or Omiq (<https://www.omiq.ai>) for clustering visualization and analysis.

### 330 *High-dimensional data analysis of flow cytometry data*

331 Uniform Manifold Approximation and Projection (UMAP) and FlowSOM clustering analyses were

332 performed on Omiq (<https://www.omiq.ai>), using equal random sampling of 3000 live CD45+ singlets.

333 from each FCS file. The UMAP plot was generated with the parameters of 15 neighbors and 0.4

334 minimum distance. All markers in flow panel were used for analysis except live/dead and CD45.

### 335 *ScRNA-seq using 10x Genomics platform*

336 10x Genomics Single Cell 5' v1 chemistry was used to generate Gel Bead-In Emulsions (GEM), and

337 perform post GEM-RT cleanup, cDNA amplification, as well as library construction. An agilent DNA

338 ScreenTape assay was used for quality control. Libraries were pooled and sequenced to saturation or

339 20,000 unique reads per cell on average using an Illumina NovaSeq6000 with 150-bp paired-end

340 reads.

### 341 *Processing and quality control of scRNA-seq*

342 Raw sequencing data were initially processed with 10x Genomics Cell Ranger pipelines (V3.1.0).

343 Briefly, BCL files were demultiplexed to generate FASTQ files. FASTQ files were aligned with STAR

344 aligner to the human genome reference GRCh38 from Ensemble database. Feature barcode

345 processing and UMI counting were then performed according to the standard workflow. (QC summary  
346 after sequencing). The following criteria were applied as quality control of single cells from all individual  
347 samples. Cells that had fewer than 1000 UMI counts or 500 genes, as well as cell that had greater than  
348 10% of mitochondrial genes were removed from further analysis. Genes that were expressed by fewer  
349 than 10 cells were also excluded. After filtering, a total of 424,080 cells with 18,765 gene features were  
350 kept for the downstream analysis.

### 351 *Dimensionality reduction and clustering analysis*

352 The filtered gene-barcode matrix was analyzed using Seurat 3 (28). All the procedures were conducted  
353 with the default parameters unless otherwise specified. Briefly, data were first normalized using log  
354 transformation and adjusted with a scale factor of 10,000. The top 2,000 variable genes were identified,  
355 and percentages of mitochondrial genes were regressed out when scaling data. Principle component  
356 analysis (PCA) was performed using these top variable genes, and top 25 principle components (PCs)  
357 were selected for graph-based clustering with Shared Nearest Neighbor (SNN) and visualization in  
358 UMAP. The resolution was set to 0.35 to identify major immune cell subsets in PBMCs. Sub-clustering  
359 of CD161<sup>hi</sup> T cells (21,610 cells) was also performed using the analytic pipeline mentioned above with  
360 two modifications: top 10 PCs were used, and the resolution was set to 0.1 to identify MAIT cell  
361 clusters.

### 362 *Differential gene expression analysis*

363 Differentially expressed genes (DEGs) were identified using Seurat 3 (FindAllMarkers or FindMarkers  
364 Functions) with either 'wilcox' for all cluster markers or 'DESeq2' (47). Randomly downsampled data  
365 with 100,000 cells were used to find all markers of PBMC clusters. A gene was considered significant  
366 with adjusted p-value or false discovery rate (FDR) < 0.05. DEGs results of all PBMCs and MAIT cells  
367 are listed in Table S3 and S4.

### 368 *Pathway enrichment analysis*



369 Top 100 DEGs of MAIT clusters were used for pathway enrichment analysis using Reactome Pathway  
370 Database (<https://reactome.org>). A pathway was considered significantly over-presented with FDR  
371 < 0.05. The full pathway enrichment results are summarized in Table S5.

#### 372 *Inference of ligand-receptor interactions between T cells and monocytes*

373 Ligand-receptor interactions between T cells and monocytes were inferred using CellPhoneDB (33).  
374 PBMC scRNA-seq data were randomly downsampled to 50,000 cells and T and monocyte clusters  
375 were extracted based on the expression of their lineage markers. CellPhoneDB was with default  
376 parameters (<https://github.com/Teichlab/cellphonedb>). The inferred interactions are considered  
377 significant when p-value < 0.05.

#### 378 *Integration of BALF and NPS dataset*

379 Publicly available scRNA-seq data of BALF (36) and of NPS (37) were downloaded and processed  
380 using Seurat 3 as previously described (28). All T cell clusters, were extracted from both dataset and  
381 integrated via Single Cell Transform (SCT) method in Seurat 3. Top 3,000 variable features were  
382 selected for the integration. Dimensionality reduction was conducted using PCA and UMAP embedding  
383 of the top 100 PCs. Clusters were visualized at a resolution of 0.8 after constructing a SNN graph using  
384 the first 50 PCs.

#### 385 *Calculations of the feature scores in MAIT cells*

386 The DEGs between MAIT1 and MAIT2 were used to generate their feature scores as previously  
387 described (48). The feature scores were calculated using AddModuleScore function in Seurat 3. MAIT  
388 cells from different single cell dataset were plotted with MAIT1 feature and MAIT2 feature for  
389 visualization.

#### 390 *Statistical analysis*

391 Data normality and homogeneity of variance were assessed using Kolmogorov-Smirnov test and  
392 Bartlett's test, respectively. Due to the distribution and variance of human data, non-parametric  
393 statistical tests were favorably used throughout this study unless otherwise specified. Mann Whitney U  
394 test was used for two-group comparisons, and Kruskal-Wallis with post hoc Dunn's test was used for  
395 comparisons of three groups and more. Spearman's correlation efficiency was used to quantify the  
396 correlation of the ranked disease severity (from healthy as 1, to hospitalized as 4). To adjust p-values  
397 for multiple hypothesis testing, FDR correction was performed using the Benjamini-Hochberg procedure  
398 when appropriate. Two-tailed tests were used unless otherwise specified. A p-value or FDR < 0.05 is  
399 consider statistically significant. Graphical data of quantifications presented throughout are expressed  
400 as the means  $\pm$  SEMs and were plotted using Graphpad Prism 8. Other graphs in this study were  
401 generated using either the corresponding analytic packages or R package ggplot2.

#### 402 *Data availability*

403 All clinical metadata of participants and samples in this study are included in Table S1. Data will be  
404 shared upon the acceptance of this manuscript. Publicly available scRNA-seq data of BALF (36) were  
405 downloaded from GEO with the accession number GSE145926, and the count data of NPS (37) were  
406 downloaded from <https://doi.org/10.6084/m9.figshare.12436517>. All of the raw fcs files and all scripts  
407 used for data analysis are available to share per request.

408

409 **Acknowledgements:** We would like to thank Monica DeLay and Patrick Duncker (Cytex Biosciences)  
410 for their help with spectral flow cytometry, and Chris Ciccolella and Geoff Kraker (Omiq, Inc). We would  
411 also like to thank Maria Miggs, Deborah Murray, Tyffany Locklear, Robert Rolfe, Jack Anderson, Allison  
412 Fullenkamp, Raul Louzuo, Thad Gurley and Julie Steinbrink for their work, as well as the support from  
413 Durham Veterans Affairs Health Care System and Duke Regional Hospital.

414 **Funding:** This work was supported by NIH/NIAID (U01AI066569, UM1AI104681), the U.S. Defense  
415 Advanced Projects Agency (DARPA, N66001-09-C-2082 and HR0011-17-2-0069), the Veterans Affairs  
416 Health System, and Virology Quality Assurance (VQA) 75N93019C00015. COVID-19 samples were  
417 processed under Biosafety level (BSL)-2 with aerosol management enhancement or BSL-3 in the Duke  
418 Regional Biocontainment Laboratory which received partial support for construction from NIH/NIAID  
419 (UC6AI058607).

420 **Competing interests:** MTM reports grants on biomarker diagnostics from the Defense Advanced  
421 Research Projects Agency (DARPA), National Institutes of Health (NIH), Sanofi, and the Department of  
422 Veterans Affairs. TWB reports grants from DARPA and is a consultant for Predigen; MTM, TWB, ELT,  
423 GSG, and CWW report patents pending on Molecular Methods to Diagnose and Treat Respiratory  
424 Infections. ELT reports grants on biomarker diagnostics from DARPA, the NIH/Antibacterial Resistance  
425 Leadership Group (ARLG) ; an ownership stake in Predigen; GSG reports an ownership stake in  
426 Predigen; CWW reports grants on biomarker diagnostics from DARPA, NIH/ARLG, Predigen, and  
427 Sanofi; and has received consultancy fees from bioMerieux, Roche, Biofire, Giner, and Biomeme.

428 **REFERENCES**

- 429 1. E. Dong, H. Du, L. Gardner, An interactive web-based dashboard to track COVID-19 in real  
430 time. *Lancet Infect Dis* **20**, 533-534 (2020).
- 431 2. E. P. Scully, J. Haverfield, R. L. Ursin, C. Tannenbaum, S. L. Klein, Considering how biological  
432 sex impacts immune responses and COVID-19 outcomes. *Nat Rev Immunol* **20**, 442-447  
433 (2020).
- 434 3. I. G. Alghamdi *et al.*, The pattern of Middle East respiratory syndrome coronavirus in Saudi  
435 Arabia: a descriptive epidemiological analysis of data from the Saudi Ministry of Health. *Int J*  
436 *Gen Med* **7**, 417-423 (2014).
- 437 4. J. Karlberg, D. S. Chong, W. Y. Lai, Do men have a higher case fatality rate of severe acute  
438 respiratory syndrome than women do? *Am J Epidemiol* **159**, 229-231 (2004).
- 439 5. H. N. Leong *et al.*, SARS in Singapore--predictors of disease severity. *Ann Acad Med Singap*  
440 **35**, 326-331 (2006).
- 441 6. R. Channappanavar *et al.*, Sex-Based Differences in Susceptibility to Severe Acute Respiratory  
442 Syndrome Coronavirus Infection. *J Immunol* **198**, 4046-4053 (2017).
- 443 7. S. L. Klein, K. L. Flanagan, Sex differences in immune responses. *Nat Rev Immunol* **16**, 626-  
444 638 (2016).
- 445 8. M. J. Polanczyk *et al.*, Cutting edge: estrogen drives expansion of the CD4+CD25+ regulatory T  
446 cell compartment. *J Immunol* **173**, 2227-2230 (2004).
- 447 9. D. Furman *et al.*, Systems analysis of sex differences reveals an immunosuppressive role for  
448 testosterone in the response to influenza vaccination. *Proc Natl Acad Sci U S A* **111**, 869-874  
449 (2014).
- 450 10. M. Griesbeck *et al.*, Sex Differences in Plasmacytoid Dendritic Cell Levels of IRF5 Drive Higher  
451 IFN-alpha Production in Women. *J Immunol* **195**, 5327-5336 (2015).
- 452 11. D. Mathew *et al.*, Deep immune profiling of COVID-19 patients reveals distinct immunotypes  
453 with therapeutic implications. *Science* **369**, (2020).
- 454 12. A. Silvin *et al.*, Elevated Calprotectin and Abnormal Myeloid Cell Subsets Discriminate Severe  
455 from Mild COVID-19. *Cell* **182**, 1401-1418 e1418 (2020).
- 456 13. J. Schulte-Schrepping *et al.*, Severe COVID-19 Is Marked by a Dysregulated Myeloid Cell  
457 Compartment. *Cell* **182**, 1419-1440 e1423 (2020).
- 458 14. E. R. Mann *et al.*, Longitudinal immune profiling reveals key myeloid signatures associated with  
459 COVID-19. *Sci Immunol* **5**, (2020).
- 460 15. Y. Peng *et al.*, Broad and strong memory CD4(+) and CD8(+) T cells induced by SARS-CoV-2  
461 in UK convalescent individuals following COVID-19. *Nat Immunol* **21**, 1336-1345 (2020).
- 462 16. T. Sekine *et al.*, Robust T Cell Immunity in Convalescent Individuals with Asymptomatic or Mild  
463 COVID-19. *Cell* **183**, 158-168 e114 (2020).

- 464 17. N. Le Bert *et al.*, SARS-CoV-2-specific T cell immunity in cases of COVID-19 and SARS, and  
465 uninfected controls. *Nature* **584**, 457-462 (2020).
- 466 18. D. Weiskopf *et al.*, Phenotype and kinetics of SARS-CoV-2-specific T cells in COVID-19  
467 patients with acute respiratory distress syndrome. *Sci Immunol* **5**, (2020).
- 468 19. D. M. Del Valle *et al.*, An inflammatory cytokine signature predicts COVID-19 severity and  
469 survival. *Nat Med* **26**, 1636-1643 (2020).
- 470 20. T. Takahashi *et al.*, Sex differences in immune responses that underlie COVID-19 disease  
471 outcomes. *Nature*, (2020).
- 472 21. M. T. McClain *et al.*, Dysregulated transcriptional responses to SARS-CoV-2 in the periphery  
473 support novel diagnostic approaches. *medRxiv*, (2020).
- 474 22. E. Becht *et al.*, Dimensionality reduction for visualizing single-cell data using UMAP. *Nat*  
475 *Biotechnol*, (2018).
- 476 23. S. Van Gassen *et al.*, FlowSOM: Using self-organizing maps for visualization and interpretation  
477 of cytometry data. *Cytometry A* **87**, 636-645 (2015).
- 478 24. Z. Chen, E. John Wherry, T cell responses in patients with COVID-19. *Nat Rev Immunol* **20**,  
479 529-536 (2020).
- 480 25. T. Parrot *et al.*, MAIT cell activation and dynamics associated with COVID-19 disease severity.  
481 *Sci Immunol* **5**, (2020).
- 482 26. L. Kuri-Cervantes *et al.*, Comprehensive mapping of immune perturbations associated with  
483 severe COVID-19. *Sci Immunol* **5**, (2020).
- 484 27. Y. Jouan *et al.*, Phenotypical and functional alteration of unconventional T cells in severe  
485 COVID-19 patients. *J Exp Med* **217**, (2020).
- 486 28. T. Stuart *et al.*, Comprehensive Integration of Single-Cell Data. *Cell* **177**, 1888-1902 e1821  
487 (2019).
- 488 29. G. Chen *et al.*, Clinical and immunological features of severe and moderate coronavirus disease  
489 2019. *J Clin Invest* **130**, 2620-2629 (2020).
- 490 30. Q. Zhao *et al.*, Lymphopenia is associated with severe coronavirus disease 2019 (COVID-19)  
491 infections: A systemic review and meta-analysis. *Int J Infect Dis* **96**, 131-135 (2020).
- 492 31. L. Tan *et al.*, Lymphopenia predicts disease severity of COVID-19: a descriptive and predictive  
493 study. *Signal Transduct Target Ther* **5**, 33 (2020).
- 494 32. C. Huang *et al.*, Clinical features of patients infected with 2019 novel coronavirus in Wuhan,  
495 China. *Lancet* **395**, 497-506 (2020).
- 496 33. M. Efremova, M. Vento-Tormo, S. A. Teichmann, R. Vento-Tormo, CellPhoneDB: inferring cell-  
497 cell communication from combined expression of multi-subunit ligand-receptor complexes. *Nat*  
498 *Protoc* **15**, 1484-1506 (2020).

- 499 34. A. J. Wilk *et al.*, A single-cell atlas of the peripheral immune response in patients with severe  
500 COVID-19. *Nat Med* **26**, 1070-1076 (2020).
- 501 35. H. Flament *et al.*, Outcome of SARS-CoV-2 infection linked to MAIT cell activation and  
502 cytotoxicity: evidence for an IL-18 dependent mechanism. *medRxiv*, (2020).
- 503 36. M. Liao *et al.*, Single-cell landscape of bronchoalveolar immune cells in patients with COVID-19.  
504 *Nat Med* **26**, 842-844 (2020).
- 505 37. R. L. Chua *et al.*, COVID-19 severity correlates with airway epithelium-immune cell interactions  
506 identified by single-cell analysis. *Nat Biotechnol* **38**, 970-979 (2020).
- 507 38. S. De Biasi *et al.*, Marked T cell activation, senescence, exhaustion and skewing towards TH17  
508 in patients with COVID-19 pneumonia. *Nat Commun* **11**, 3434 (2020).
- 509 39. M. Merad, J. C. Martin, Pathological inflammation in patients with COVID-19: a key role for  
510 monocytes and macrophages. *Nat Rev Immunol* **20**, 355-362 (2020).
- 511 40. J. Novak, J. Dobrovolny, L. Novakova, T. Kozak, The decrease in number and change in  
512 phenotype of mucosal-associated invariant T cells in the elderly and differences in men and  
513 women of reproductive age. *Scand J Immunol* **80**, 271-275 (2014).
- 514 41. O. J. Lee *et al.*, Circulating mucosal-associated invariant T cell levels and their cytokine levels in  
515 healthy adults. *Exp Gerontol* **49**, 47-54 (2014).
- 516 42. P. Chen *et al.*, Circulating Mucosal-Associated Invariant T Cells in a Large Cohort of Healthy  
517 Chinese Individuals From Newborn to Elderly. *Front Immunol* **10**, 260 (2019).
- 518 43. N. Chen *et al.*, Epidemiological and clinical characteristics of 99 cases of 2019 novel  
519 coronavirus pneumonia in Wuhan, China: a descriptive study. *Lancet* **395**, 507-513 (2020).
- 520 44. A. G. Laing *et al.*, A dynamic COVID-19 immune signature includes associations with poor  
521 prognosis. *Nat Med* **26**, 1623-1635 (2020).
- 522 45. S. Gerart *et al.*, Human iNKT and MAIT cells exhibit a PLZF-dependent proapoptotic propensity  
523 that is counterbalanced by XIAP. *Blood* **121**, 614-623 (2013).
- 524 46. J. Dias, E. Leeansyah, J. K. Sandberg, Multiple layers of heterogeneity and subset diversity in  
525 human MAIT cell responses to distinct microorganisms and to innate cytokines. *Proc Natl Acad  
526 Sci U S A* **114**, E5434-E5443 (2017).
- 527 47. M. I. Love, W. Huber, S. Anders, Moderated estimation of fold change and dispersion for RNA-  
528 seq data with DESeq2. *Genome Biol* **15**, 550 (2014).
- 529 48. I. Tirosh *et al.*, Dissecting the multicellular ecosystem of metastatic melanoma by single-cell  
530 RNA-seq. *Science* **352**, 189-196 (2016).

532  
533

**Table 1. Summary of Patient Demographics and Sample Information**

| <b>Group</b>                                                               |                    | <b>healthy</b>               | <b>exposed</b>               | <b>infected</b>              | <b>hospitalized</b>          | <b>total</b>                 |
|----------------------------------------------------------------------------|--------------------|------------------------------|------------------------------|------------------------------|------------------------------|------------------------------|
| <b>Age</b><br>mean $\pm$ SD (range)                                        |                    | 39.70 $\pm$ 13.68<br>(25-61) | 42.57 $\pm$ 13.93<br>(17-60) | 36.73 $\pm$ 13.88<br>(20-65) | 59.44 $\pm$ 15.11<br>(31-76) | 42.84 $\pm$ 16.06<br>(17-76) |
| <b># subjects</b><br>(F:M ratio)                                           |                    | n = 10<br>(5:5)              | n = 7<br>(3:4)               | n = 19<br>(8:11)             | n = 9<br>(4:5)               | n = 45<br>(20:25)            |
| <b>Race</b><br>n (%)                                                       | African American   | 3 (30.00%)                   | 0                            | 1 (5.26%)                    | 5 (55.56%)                   | 9 (20.00%)                   |
|                                                                            | Asian              | 0                            | 1 (14.29%)                   | 2 (10.53%)                   | 0                            | 3 (6.67%)                    |
|                                                                            | White              | 7 (70.00%)                   | 5 (71.42%)                   | 16 (84.21%)                  | 3 (33.33%)                   | 31(68.89%)                   |
|                                                                            | Others/<br>unknown | 0                            | 1 (14.29%)                   | 0                            | 1 (11.11%)                   | 2 (4.44%)                    |
| <b>Days</b> since onset<br>when enrolled<br>mean $\pm$ SD (range)          |                    | N/A                          | 15.17 $\pm$ 11.25<br>(5-33)  | 11.18 $\pm$ 4.30<br>(3-19)   | 8.25 $\pm$ 6.14<br>(1-18)    | 11.19 $\pm$ 6.73<br>(1-33)   |
| <b># samples</b> of flow<br>cytometry (F:M ratio)                          |                    | n = 10<br>(5:5)              | n = 20<br>(9:11)             | n = 44<br>(21:23)            | n = 9<br>(4:5)               | n = 83<br>(39:44)            |
| <b># samples</b> of scRNA-<br>seq (F:M ratio)                              |                    | n = 5<br>(F:M = 3:2)         | n = 8<br>(F:M = 3:5)         | n = 29<br>(F:M = 12:17)      | n = 6<br>(F:M = 1:5)         | n = 48<br>(F:M = 19:29)      |
| <b>Days</b> since onset<br>when samples collected<br>mean $\pm$ SD (range) |                    | N/A                          | 26.94 $\pm$ 14.94<br>(5-61)  | 18.27 $\pm$ 8.44<br>(3-40)   | 8.25 $\pm$ 6.14<br>(1-18)    | 19.32 $\pm$ 11.44<br>(1-61)  |

534

535 **Fig. 1 Sex-Specific CD8<sup>+</sup> T cell Responses in PBMCs of COVID-19 Patients. (A)** Overview of  
536 patient groups in this study. **(B)** UMAP visualization of PBMC subsets identified by FlowSOM  
537 clustering. Samples from all participants were pooled and down-sampled to 3,000 live CD45<sup>+</sup> cells per  
538 sample. MO, monocytes; NK, natural killer cells; DC, dendritic cells, PMNs, polymorphonuclear  
539 neutrophils. Baso, basophils. **(C)** Expression of CD161, TCR  $\gamma\delta$  and CD56 in CD8<sup>+</sup> T cell subsets. **(D)**  
540 UMAP of samples grouped by disease severity. Samples collected within 3 days from enrollment were  
541 included. **(E)** Frequencies of CD161<sup>hi</sup> T cells in different severity groups (left) and their correlation with  
542 severity rank (right). **(F)** UMAP of samples stratified by sex and time post symptom onset (early,  $\leq 14$   
543 days; middle,  $>15$  days and  $\leq 21$  days; late,  $>22$  days). **(G)** Frequencies of CD161<sup>hi</sup> and memory CD8<sup>+</sup> T  
544 cells between sex and timepoints. **(H)** Sex-specific changes of CD161<sup>hi</sup> cells frequencies shown in G.  
545 **(I)** Frequencies of CD161<sup>hi</sup> and memory CD8<sup>+</sup> T cells in the samples from confirmed COVID-19  
546 subjects pre- and post-seroconversion. Data were plotted as mean  $\pm$  standard error. Significance was  
547 determined by Kruskal-Wallis test with Dunn's test (E, H) or Mann Whitney test (G, I): \* $p < 0.05$ ,  
548 \*\* $p < 0.01$ .

549 **Fig. 2 Characterization of CD8<sup>+</sup>CD161<sup>hi</sup> T cells in COVID-19 using scRNA-seq. (A)** UMAP and  
550 unsupervised cluster analysis of PBMCs. MO, monocytes; RBC, red blood cells; PB, plasmablasts;  
551 PLT, platelets; DC, dendritic cells. **(B and C)** Visualization of different T cell subsets with high resolution  
552 in UMAP (B) and expression of their marker genes as indicated in Violin plots (C). T\* cluster likely  
553 represents a dropout population with low UMI counts. N, naïve; EM, effect memory; CM, central  
554 memory; DN, double negative; rep, replicating. **(D)** Changes of T cell subsets with disease severity. N,  
555 the number of individuals. **(E)** Frequencies of CD161<sup>hi</sup> cluster relative to all T cell subsets. Females  
556 were plotted in red and males in blue. Red dash box delineated the healthy females. **(F)** Top enriched  
557 pathways of CD161<sup>hi</sup> cluster in Reactome Pathway Database ranked by false discovery rate (FDR, -  
558 log<sub>10</sub> scale). Data were plotted as mean  $\pm$  standard error. Significance was determined by Kruskal-  
559 Wallis test (E).



560 **Fig. 3 Heterogeneity and Dynamics of Circulating MAIT cells across Sex in COVID-19. (A)** Sub-  
561 clustering of CD161<sup>hi</sup> cells (n = 21,610) showing two MAIT clusters and one  $\gamma\delta$  T cluster. **(B)** Marker  
562 gene expression of three CD161<sup>hi</sup> clusters. **(C)** Heatmap of top 25 discriminative genes between  
563 MAIT $\alpha$  and MAIT $\beta$  clusters. Expression level was scaled by Z-score distribution. **(D and E)**  
564 Representative top enriched pathways of MAIT $\alpha$  and MAIT $\beta$  in Reactome Pathway Database (ranked  
565 by false discovery rate, -log<sub>10</sub> scale). Top 100 DEGs ranked by fold change between MAIT $\alpha$  and  
566 MAIT $\beta$  were used for this analysis. **(F and G)** UMAP visualization of MAIT cluster changes (F) and their  
567 frequencies (G) with disease severity. **(H)** Frequencies of MAIT clusters grouped by time post symptom  
568 onset. **(I and J)** Sex differences of MAIT clusters as shown in H. Data were plotted as mean  $\pm$  standard  
569 error (G-J). Significance was determined by Mann Whitney test (I). \*p<0.05.

570 **Fig. 4 MAIT Cell Differences by Sex in Airway Tissue Samples of COVID-19 Patients. (A and B)**  
571 Clustering analysis of scRNA-seq data from COVID-19 BALF dataset with subtracted T and NK cells  
572 (36). **(C)** MAIT cell cluster indicated by marker genes. **(D)** Frequencies of MAIT cells in BALF between  
573 normal and COVID-19 subjects (left) and across sex within COVID-19 subjects (right). **(E)** Integrated  
574 clustering analysis of NPS with BALF using Seurat 3. **(F)** Referenced MAIT cluster in NPS by the  
575 expression of TRAV1-2 in BALF and indicated marker genes in NPS. **(G)** Frequencies of MAIT cells in  
576 NPS from healthy and COVID-19 subjects. **(H and I)** Visualization (H) and frequencies (I) of MAIT cells  
577 in NPS grouped by disease severity. **(J)** Volcano plot showing of DEGs of BALF MAIT cells between  
578 sex with fold change and FDR. **(K to M)** Expression of DEGs in IL-7 signaling **(K)**, transcriptional factors  
579 **(L)** and CCL2 **(M)**. Data were plotted as mean  $\pm$  standard error **(D, G, I)** with females in red and males  
580 in black. Significance was determined by unpaired a one-tailed student's t-test (D), Kruskal-Wallis test  
581 with Dunn's post hoc test (I) and Mann Whitney test (G): \*p<0.05, \*\*p<0.01.

582 **Supplementary Materials**

583 **Table S1. Clinical Metadata of Participants and Samples in this study**

584 **Table S2. List of Panel Reagents for 36-color Spectral Flow Cytometry**

585 **Table S3. List of DEGs of PBMC Clusters and MAIT cells**

586 **Table S4. List of DEGs of MAIT Subsets**

587 **Table S5. List of Enriched Reactome Pathways of MAIT Subsets**

588 **Figure S1. Annotation of Immune Subsets and Gating Strategy of PBMCs from COVID-19**

589 **patients Using 36-color Flow Cytometry. (A)** Annotation of subsets for CD4 T, CD8 T cells,  $\gamma\delta$  T  
590 cells, monocytes, B cells and NK cells as shown in fig. 1B. Left-hand side in each panel is the UMAP  
591 with the indicated immune cell population (box) and the respective subsets annotated by color (legend).  
592 Right-hand side is feature plots of the indicated population showing relative expression of each marker  
593 (black= negligible; white = positive). **(B)** Gating strategy of immune cell subsets in PBMC samples.

594 **Figure S2. Frequency Profiling of Immune Subsets in COVID-19 PBMCs among Different**

595 **Disease Severity groups.** Gating strategy was shown in Fig. S1B. All data were plotted as percentage  
596 of CD45<sup>+</sup> PBMCs. Significance was determined by Kruskal-Wallis test.

597 **Figure S3. Sex-Specific Changes of CD8<sup>+</sup> CD161<sup>hi</sup> and Memory T Cells in COVID-19 PBMCs by**

598 **Flow Cytometry. (A)** Gating strategy of CD8<sup>+</sup> CD161<sup>hi</sup>, memory and naive T cells ( $\alpha\beta$ ). **(B)**

599 Representative flow plots of CD8<sup>+</sup> CD161<sup>hi</sup> and memory T cells from female and male individuals with  
600 disease severity. **(C)** Frequencies of naïve CD8 T cells in different severity groups as indicated.

601 Significance was calculated by Kruskal-Wallis.

602 **Figure S4. Characterization of Immune Subsets in COVID-19 PBMCs by scRNA-seq. (A)** High  
603 resolution clustering of PBMCs shown in Fig.2A. **(B)** Expression of marker genes used to annotate  
604 individual clusters. cl, classical; int, intermediate; nc, non-classical; CD14 MO<sub>A</sub>, activated CD14  
605 monocytes; CD16 MO<sub>A</sub>, activated CD16 monocytes; PB, plasmablasts; PLT, platelets.

606 **Figure S5. Interaction Inference of Receptors and Ligands between Monocytes and Major T Cell**  
607 **Subsets. (A and B)** Visualization **(A)** and percentage distribution **(B)** of different monocyte subsets  
608 identified in Fig.S4A. Three monocyte subsets represent resting classical CD14 (cl), non-classical  
609 CD16 (nc), and intermediate (int) monocytes as seen in healthy subjects. Two monocyte subsets are  
610 associated with interferon signaling and COVID-19 patients with differential expression of CD14 and  
611 CD16, referred to as activated CD14 and activated CD16 monocytes (CD14 MO<sub>A</sub> and CD16 MO<sub>A</sub>,  
612 respectively). **(C)** Overview of selected ligand–receptor interactions inferred by CellPhoneDB in  
613 COVID PBMC single cell dataset. Red dash box delineated the specific interaction of CD161<sup>hi</sup> T cells  
614 with monocytes. P values and scales are indicated by circle size and colors, respectively. **(D)**  
615 Expression of representative ligand and receptor pairs between MAIT and monocytes as indicated. **(E)**  
616 Heatmap of interaction counts between major T cell and monocyte subsets.

617 **Figure S6. Expression of CD69 by circulating MAIT Clusters in COVID-19. (A to D)** Data are  
618 grouped by MAIT clusters (A), sex (B), disease severity (C) as well as clusters and severity (D).

619 **Figure S7. Comparisons of MAIT $\alpha$  and MAIT $\beta$  Features in MAIT Cells from peripheral blood and**  
620 **airway tissue samples. (A)** Estimation of MAIT $\alpha$  and MAIT $\beta$  features of individual cells from PBMC  
621 and BALF dataset based on the expression of MAIT $\alpha$  gene (y-axis) and MAIT $\beta$  gene sets (x-axis).  
622 Differentially expressed genes between MAIT $\alpha$  and MAIT $\beta$  were used as two modular features,  
623 respectively. **(B to D)** Expression of IL7 receptor and its co-receptor genes (B), apoptosis-related genes  
624 (C), proliferation-related genes by MAIT cells from PBMC and BALF dataset (D).

625

626 **Figure 1**

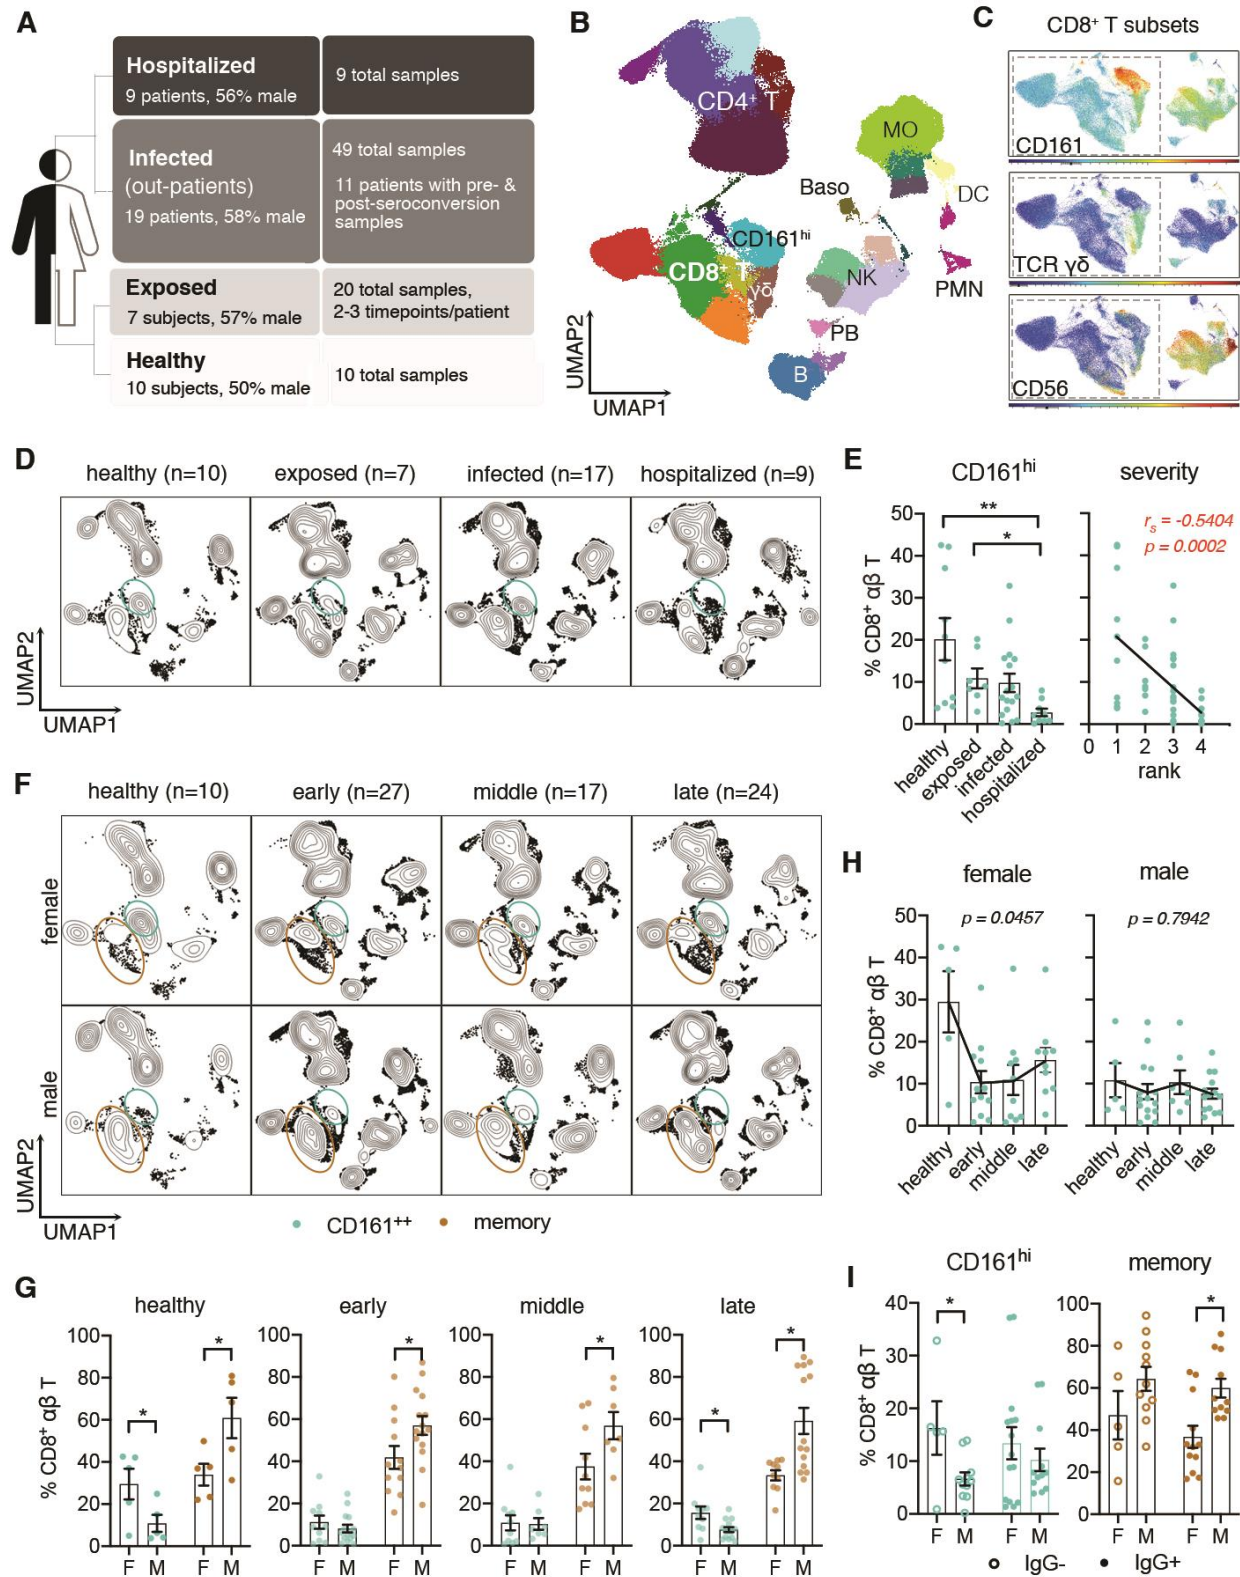

628 **Figure 2**

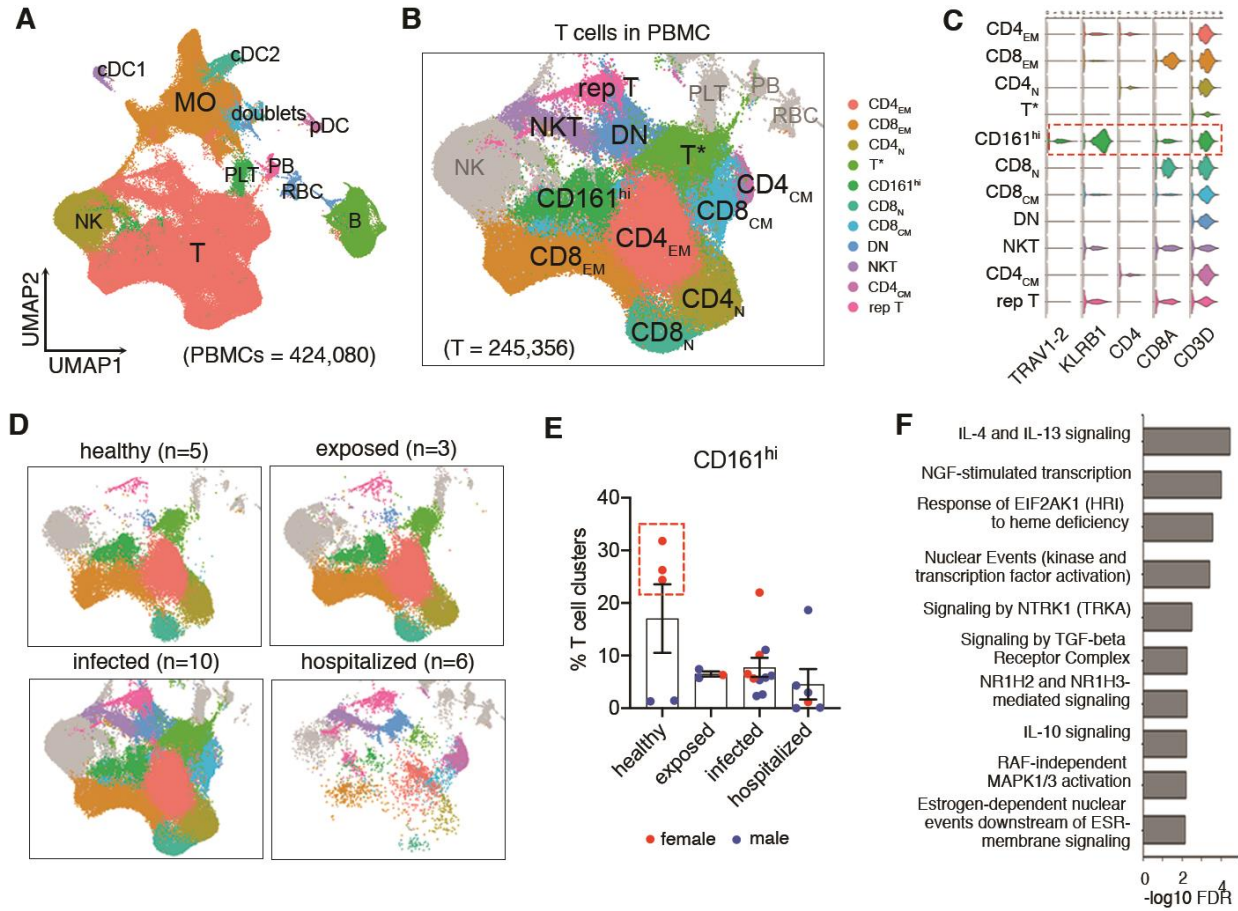

629

630

**Figure 3**

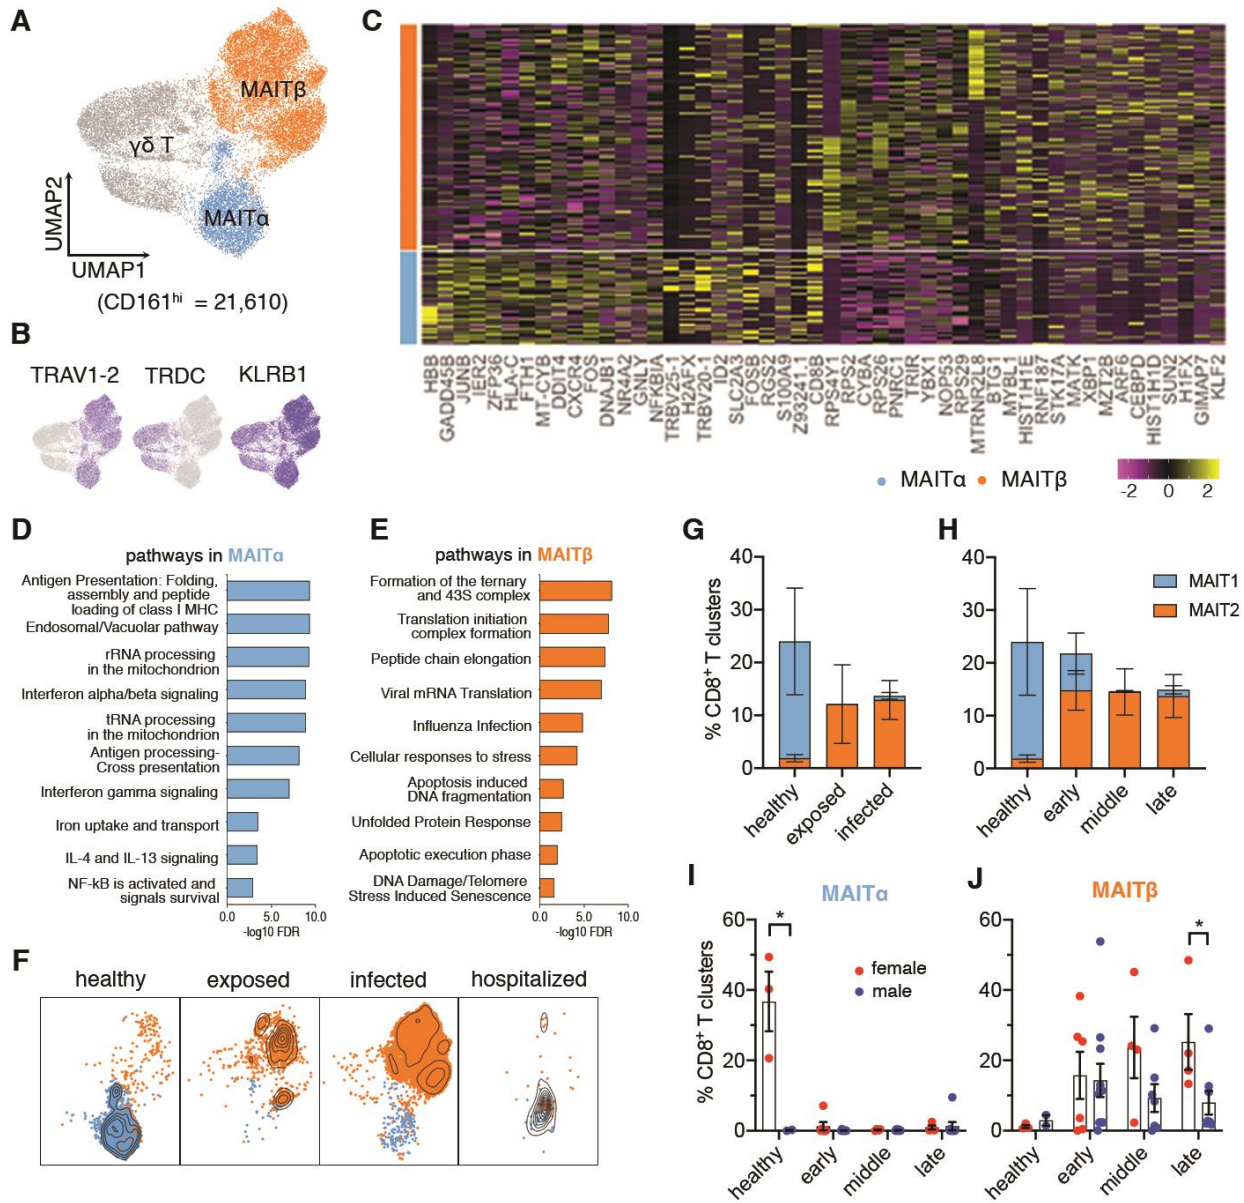

631

632

**Figure 4**

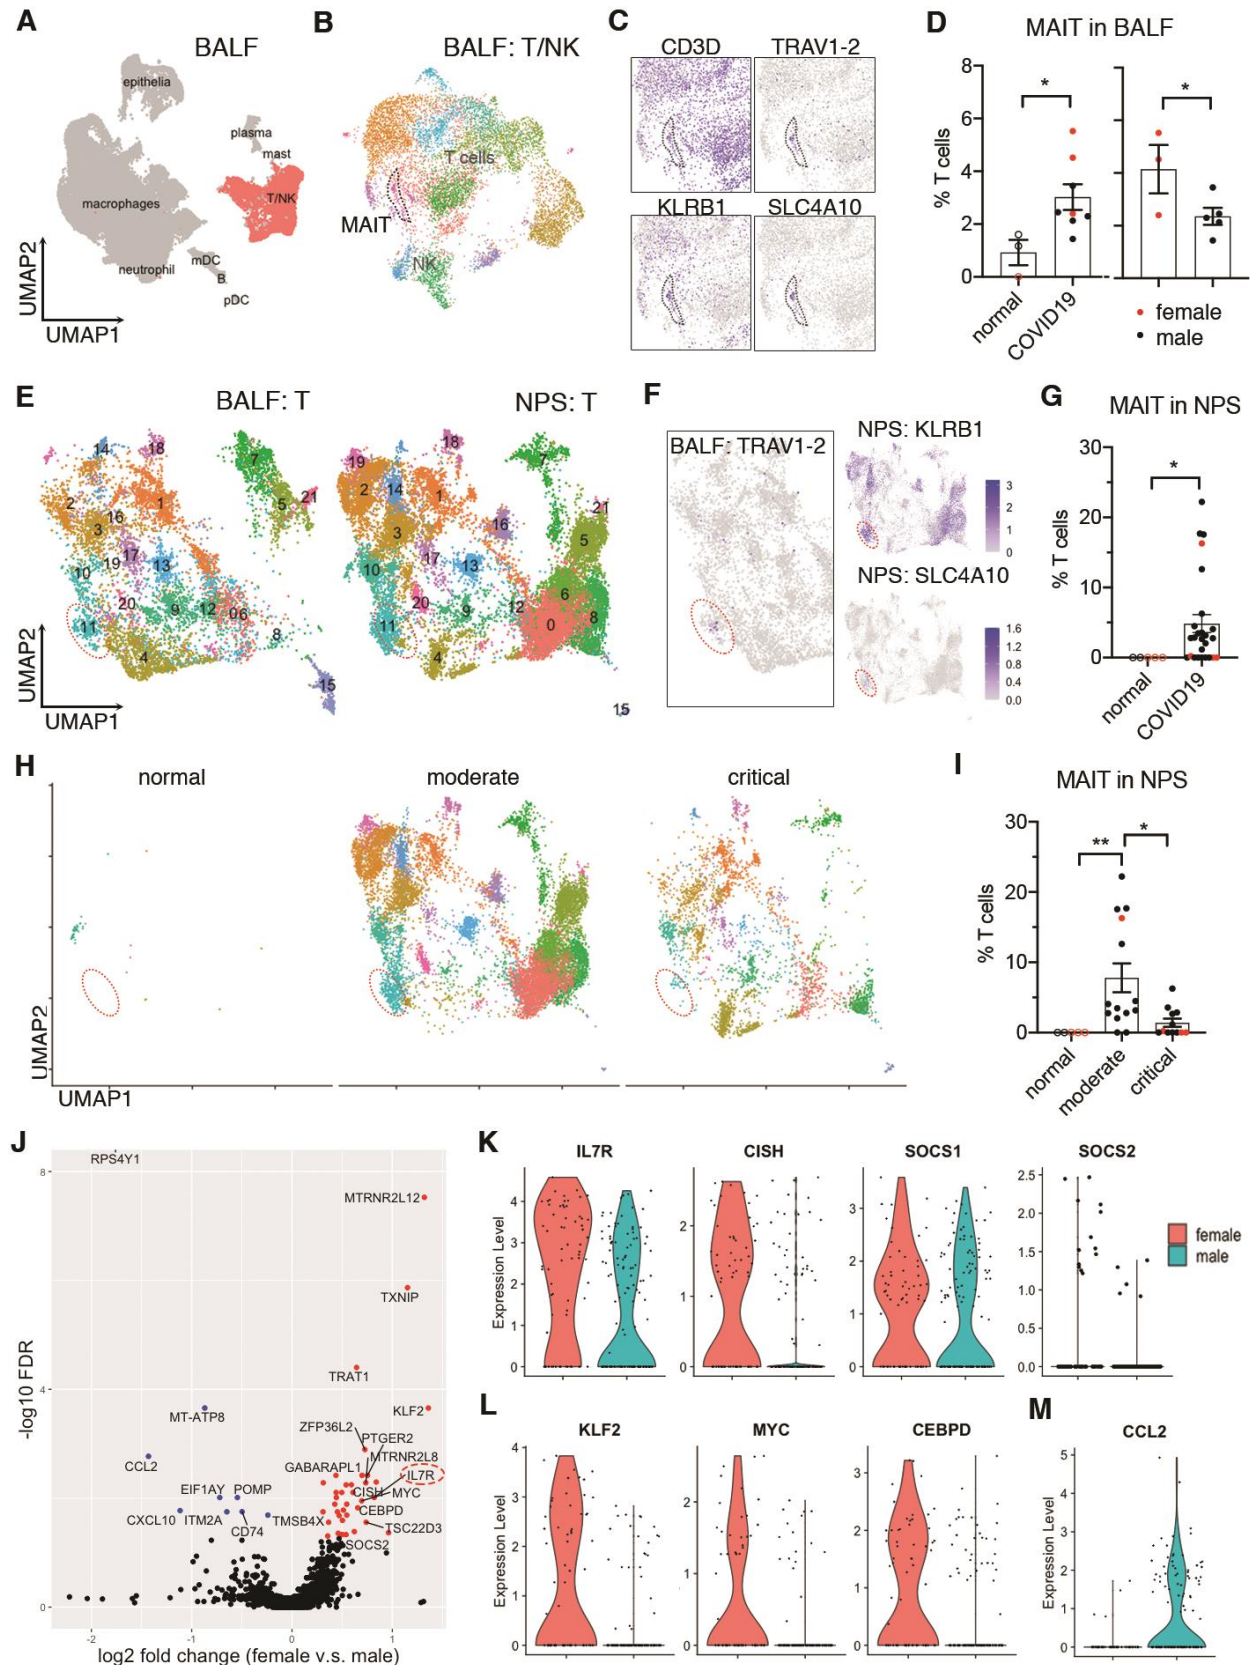

633

634

Supplementary Figure S1

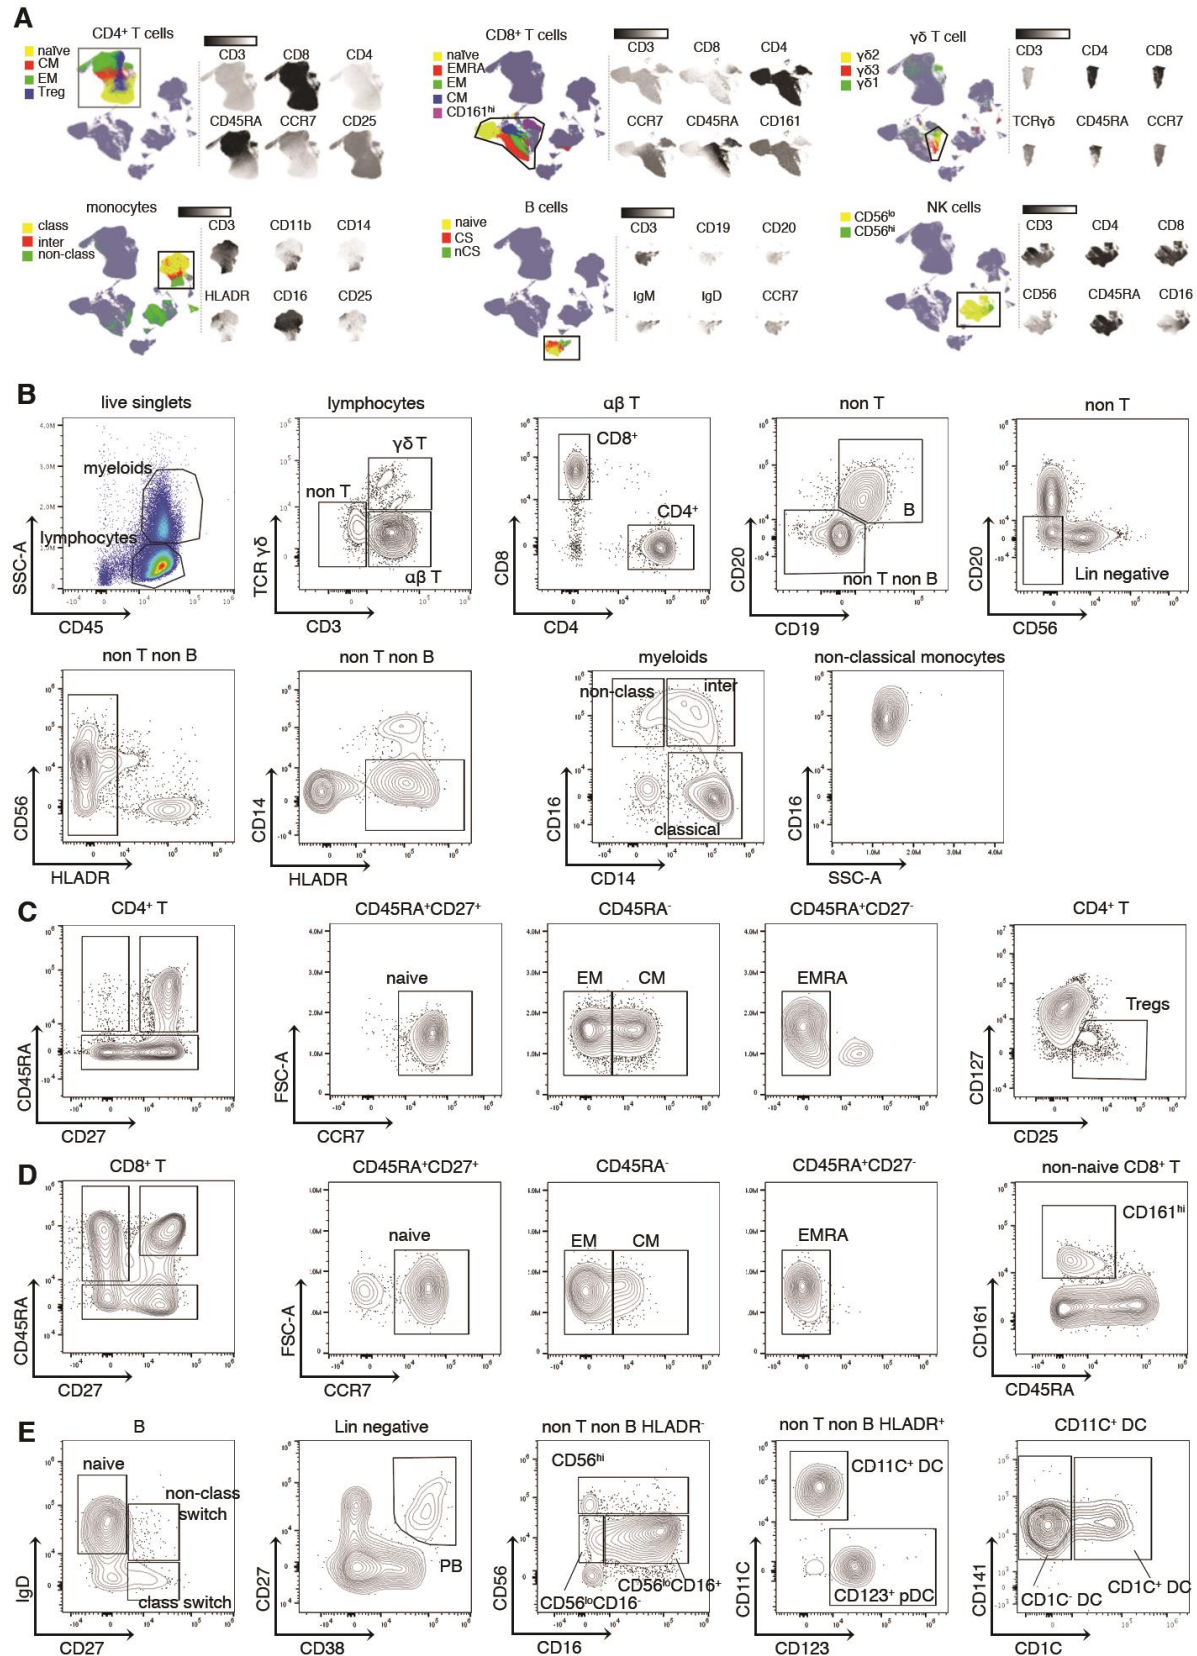



636 **Supplementary Figure S2**

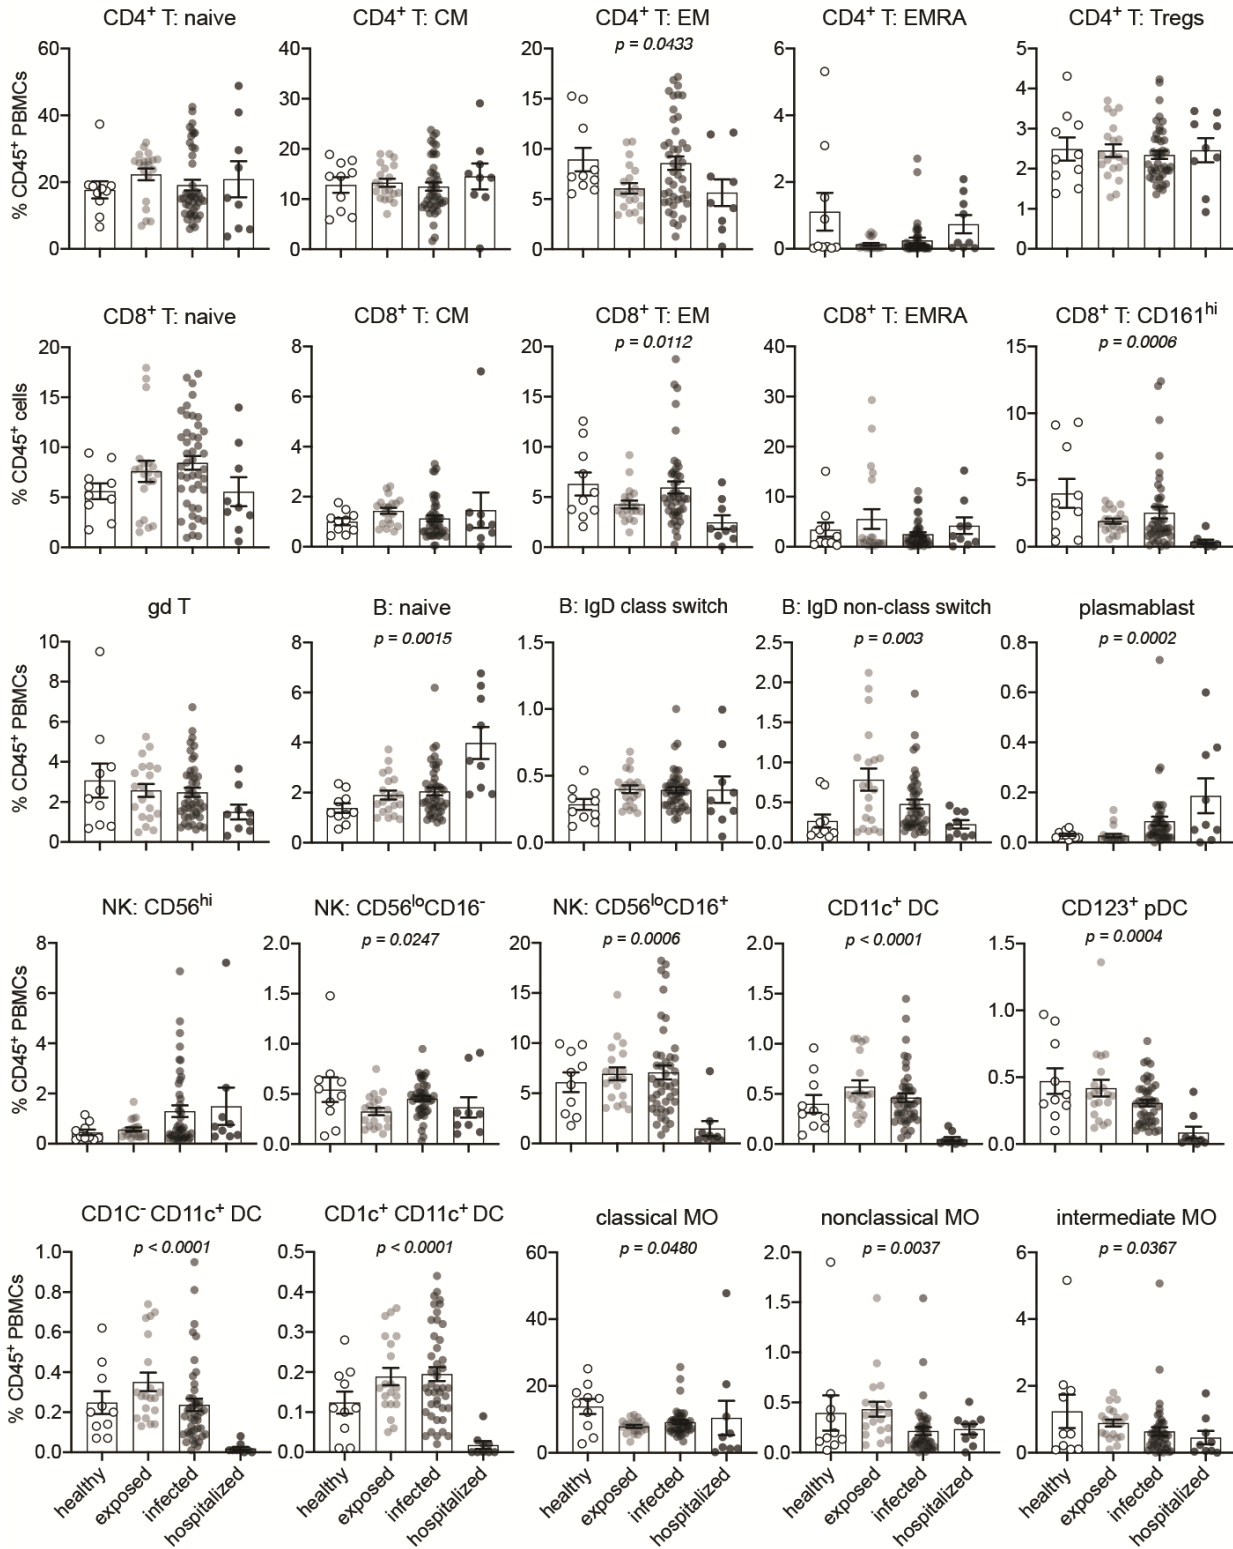

638

### Supplementary Figure S3

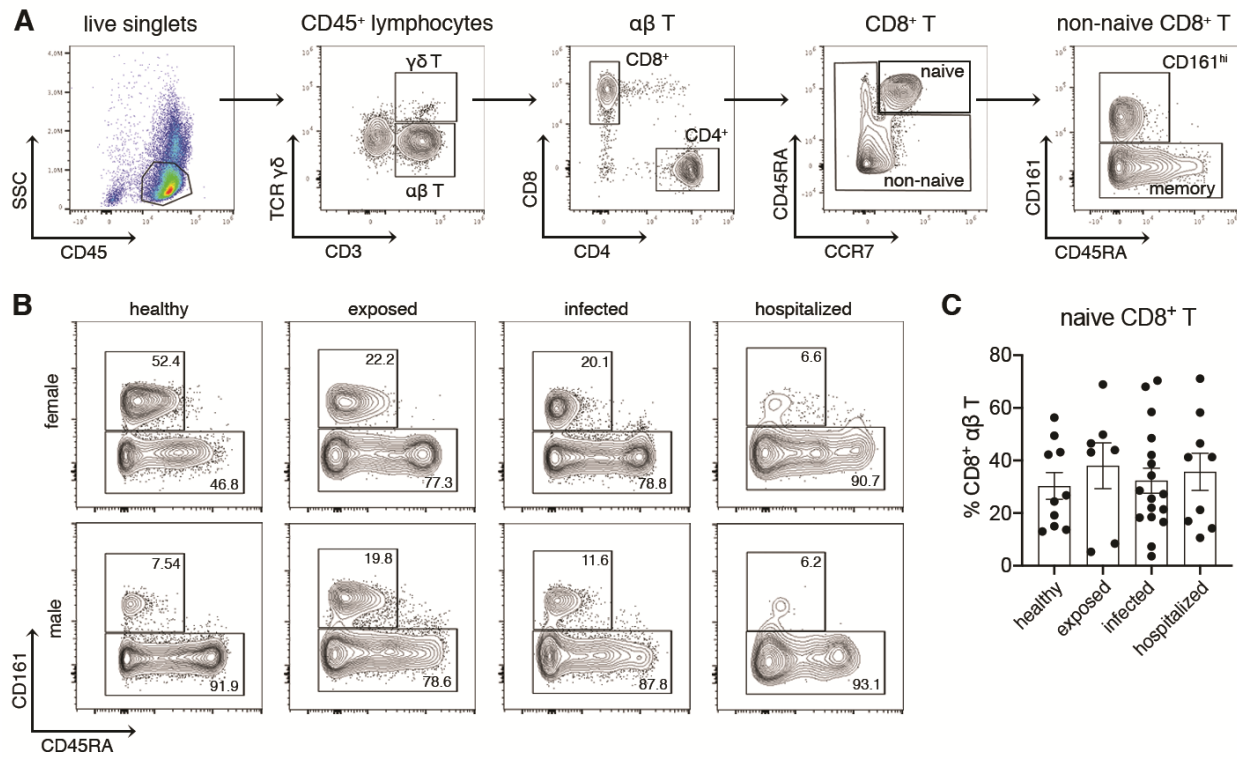

639

640

### Supplementary Figure S4

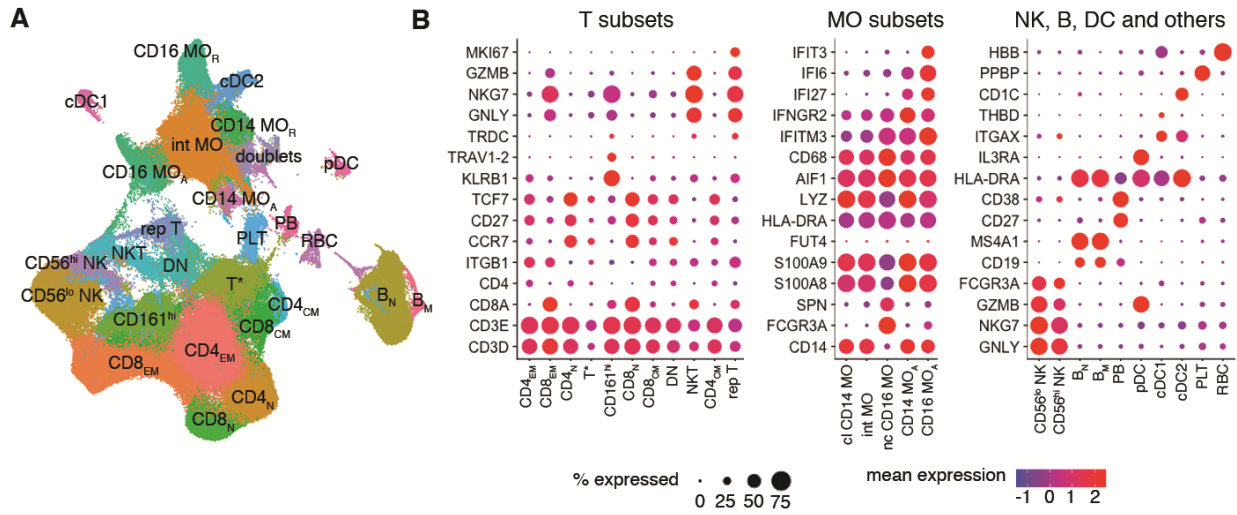

641

642

Supplementary Figure S5

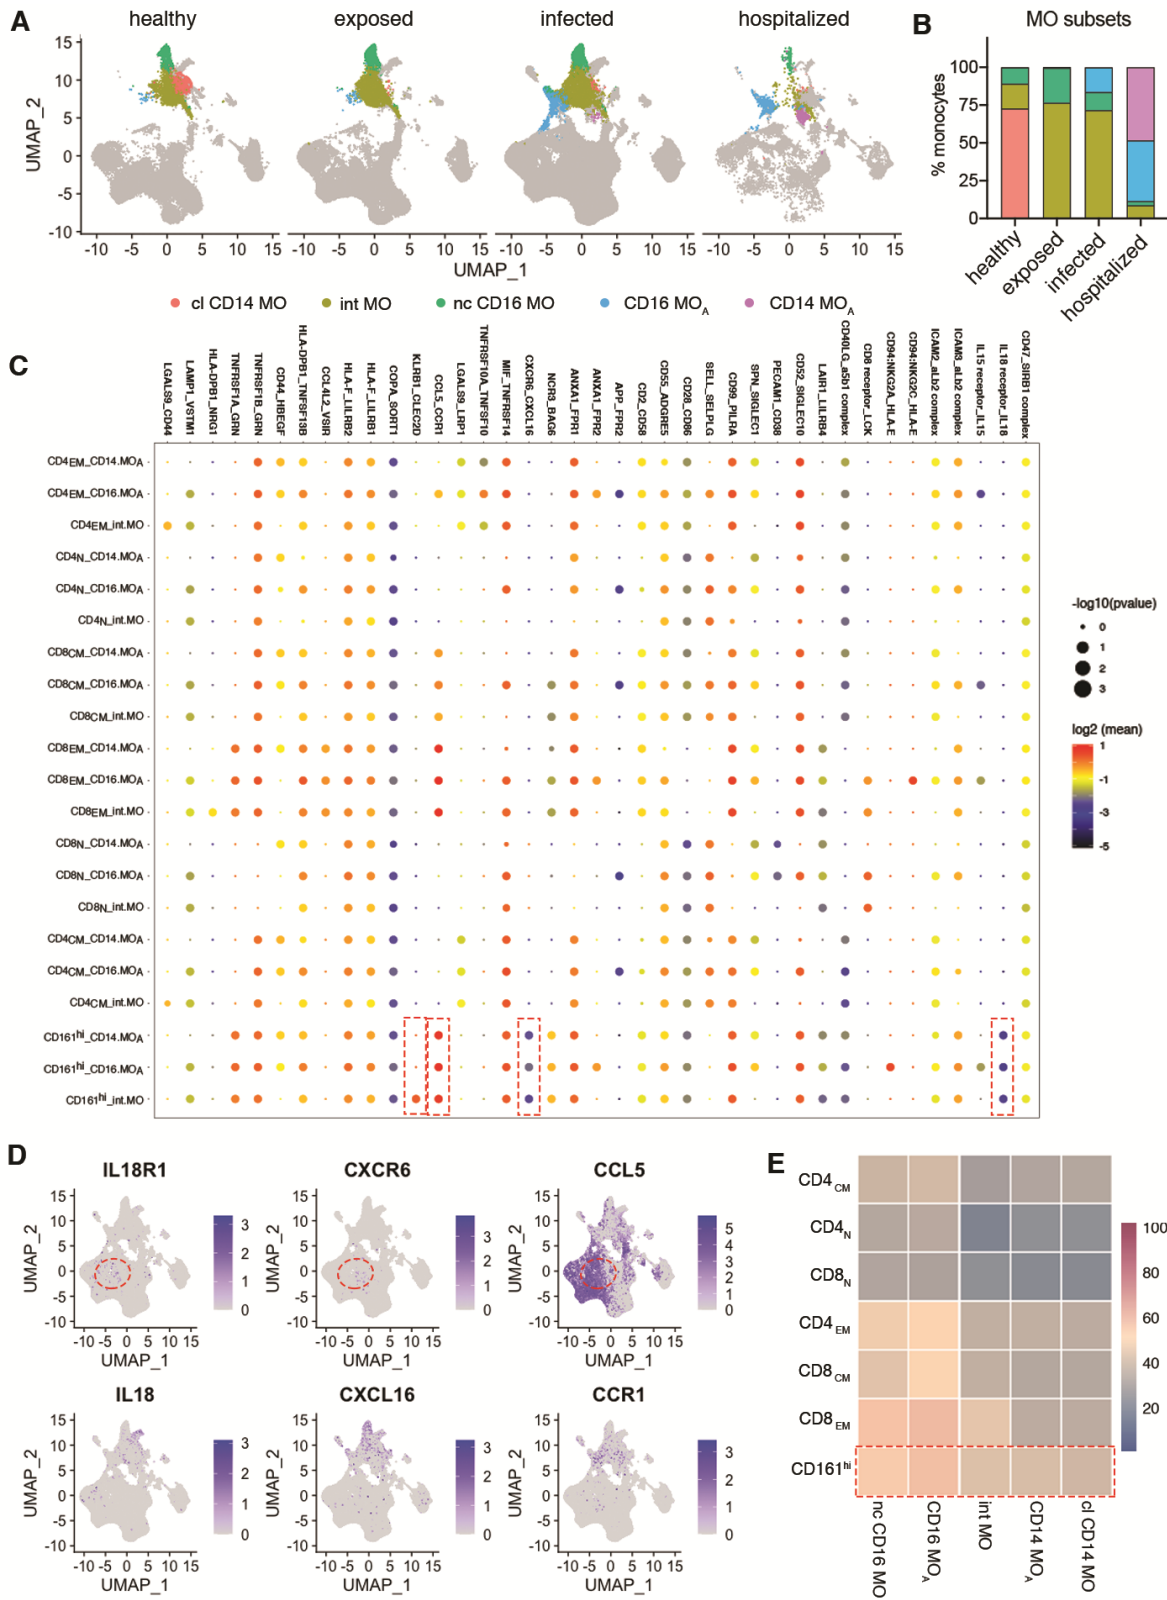

643

644

## Supplementary Figure S6

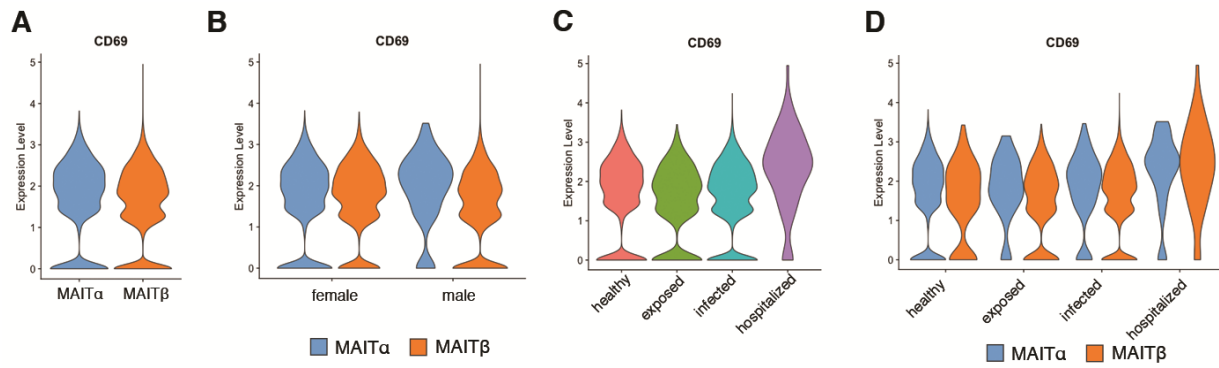

645

646

## Supplementary Figure S7

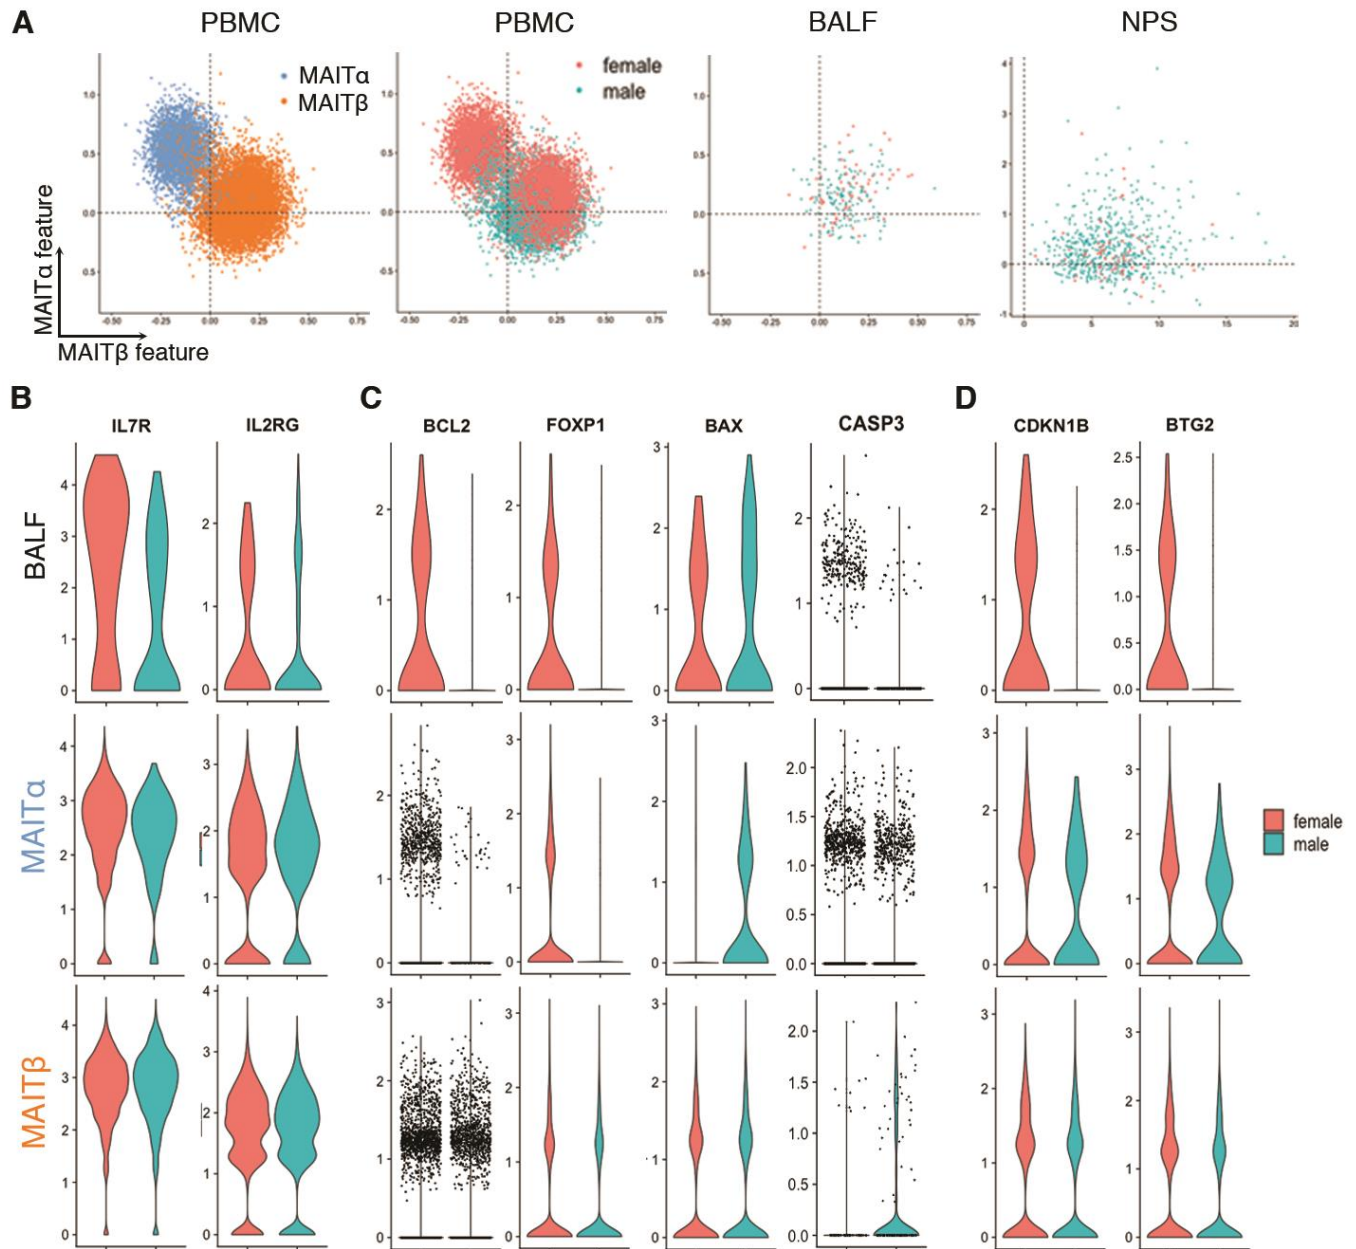

647
